# Supplementary material for: Efficient access to chiral 1,2-amino alcohols via Ir/f-amphox-catalyzed asymmetric hydrogenation of α-amino ketones
Source: Royal Society of Chemistry journal article supplement (doi:10.1039/c7qo00237h), 2017-01-01
Supplement: c7qo00237h1.pdf [file c7qo00237h1.pdf]

## *Supporting Information*

### Efficient Access to Chiral 1,2-Amino Alcohols *via* Ir/f-Amphox-Catalyzed Asymmetric Hydrogenation of $\alpha$ -Amino Ketones

Yang Hu,<sup>†a</sup> Weilong Wu,<sup>†a</sup> Xiu-Qin Dong,<sup>\*a</sup> and Xumu Zhang<sup>\*b,a</sup>

<sup>a</sup> College of Chemistry and Molecular Sciences, Wuhan University, Wuhan, Hubei, 430072, P. R. China.

<sup>b</sup> Department of Chemistry, South University of Science and Technology of China, Shenzhen, Guangdong, 518055, P. R. China.

<sup>\*</sup>Corresponding author. E-mail address: xumu@whu.edu.cn; xiuqindong@whu.edu.cn.

<sup>†</sup> Yang Hu and Weilong Wu contributed equally to this work.

## Contents

|                                                                          |    |
|--------------------------------------------------------------------------|----|
| 1. General remarks.....                                                  | 2  |
| 2. General procedure for the preparation of $\alpha$ -amino ketones..... | 2  |
| 3. Asymmetric hydrogenation of $\alpha$ -amino ketones.....              | 3  |
| 4. The synthesis of ( <i>S</i> )-Phenylephrine Hydrochloride.....        | 9  |
| 5. NMR spectra.....                                                      | 10 |
| 6. HPLC spectra.....                                                     | 25 |
| 7. Reference. ....                                                       | 55 |

## 1. General remarks:

All reactions and manipulations which are sensitive to moisture or air were performed in an argon-filled glovebox or using standard Schlenk techniques. Hydrogen gas (99.999%) was purchased from Shanghai Regulator Factory Co., Ltd. Anhydrous *i*-PrOH and EtOH were purchased from J&K. Anhydrous CF<sub>3</sub>CH<sub>2</sub>OH were purchased from Sigma-Aldrich, Anhydrous THF, 1,4-dioxane and hexane was distilled from sodium benzophenone ketyl. Anhydrous ClCH<sub>2</sub>CH<sub>2</sub>Cl were freshly distilled from calcium hydride. Na<sub>2</sub>CO<sub>3</sub>, K<sub>2</sub>CO<sub>3</sub>, Cs<sub>2</sub>CO<sub>3</sub>, NaHCO<sub>3</sub>, NaOH, KOH, *t*-BuONa and *t*-BuOK was purchased from J&K. [Ir(COD)Cl]<sub>2</sub> was prepared according to the literature.<sup>1-2</sup> <sup>1</sup>H, <sup>13</sup>C and <sup>31</sup>P NMR spectra were recorded with a Bruker ADVANCE III (400 MHz) spectrometer with CDCl<sub>3</sub> as the solvent and tetramethylsilane (TMS) as the internal standard. Chemical shifts are reported in parts per million (ppm, δ scale) downfield from TMS at 0.00 ppm and referenced to the CDCl<sub>3</sub> at 7.26 ppm (for <sup>1</sup>H NMR) or 77.0 ppm (for <sup>13</sup>C NMR). Data are reported as: multiplicity (s = singlet, d = doublet, t = triplet, q = quartet, m = multiplet), coupling constant in hertz (Hz) and signal area integration in natural numbers. <sup>13</sup>C NMR and <sup>31</sup>P NMR analyses were run with decoupling. Optical rotations [α]<sub>D</sub> were determined using a PERKIN ELMER polarimeter 343 instrument. HPLC analyses were performed using Daicel chiral column.

All the α-amino ketones were prepared according the literature.<sup>3-7</sup> The absolute configuration of products were determined by comparison of analytical data with the literature (HPLC spectra, optical rotation).<sup>6,9-12</sup> The absolute configuration of others were assigned by analogy.

## 2. General procedure for the preparation of α-amino ketones.

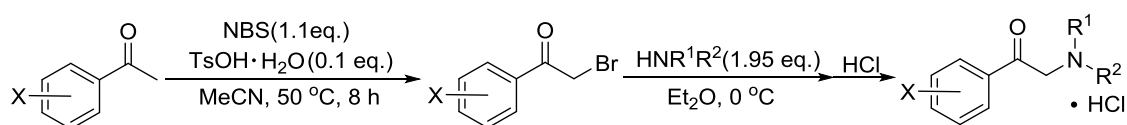

Step 1:<sup>3-4</sup> N-bromosuccinimide was added to the stirred solution of acetophenone in acetonitrile. The resulting reaction mixture was stirred for 10-15 minutes. After that *p*-TsOH·H<sub>2</sub>O was added to the reaction mixture and refluxed for 8 h and monitored by TLC. After completion of the reaction, reaction content was brought to room temperature and washed with saturated solution of sodium bicarbonate and extracted with ethyl acetate, organic layer was dried over sodium sulphate and concentrated under reduced pressure. The obtained residues were used for the next step directly.

Step 2:<sup>5-7</sup> The obtained residues of step 1 was added to the stirred solution of NHR<sup>1</sup>R<sup>2</sup> in diethylether, then stirred for 3-5 h and monitored by TLC. After completion of the reaction, the mixture was filtered and removed the solvent under reduced pressure. The residue was washed with saturated solution of sodium bicarbonate and the aqueous phase was extracted with ethyl

acetate. The combined organic extractions were dried over Na<sub>2</sub>SO<sub>4</sub> and concentrated under reduced pressure to yield a residue. The residue was purified by flash chromatography on silica gel with ethyl acetate to get the corresponding  $\alpha$ -amino ketones. The obtained  $\alpha$ -amino ketone was then treated with hydrochloric acid and recrystallized in hot anhydrous EtOH to give the corresponding hydrochloride as a white crystalline solid.

### 3. Asymmetric hydrogenation of $\alpha$ -amino ketones:<sup>3,6,8</sup>

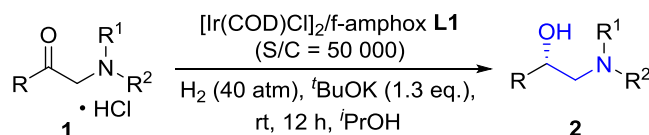

**General procedure (at S/C = 50 000):** To a 4.0 mL vial was added the catalyst precursor [Ir(COD)Cl]<sub>2</sub> (1.4 mg, 2.0×10<sup>-3</sup> mmol), ligand **L1** (2.4 mg, 4.2×10<sup>-3</sup> mmol) and anhydrous *i*-PrOH (2.0 mL) in the argon-filled glovebox. The mixture was stirred for 2.0 h at 25 °C giving orange red solution. And then 0.2 mmol of  $\alpha$ -amino ketone (as a hydrochloride), *t*-BuOK (29.2 mg, 1.3 eq.) were added into a 5 mL hydrogenation vessel. 1.0 mL anhydrous *i*-PrOH was added as solvent and a solution of Ir/f-amphox **L1** in anhydrous *i*-PrOH (2.0  $\mu$ L) was added *via* an injection port. Then the vessel was placed in an autoclave, closed it and moved it out from glovebox. The autoclave quickly purged with hydrogen gas for three times, then pressurized to 40 atm H<sub>2</sub>. The reaction solution was stirred at room temperature (25 °C-30 °C) until for 12 h, then released pressure carefully. The solution of reaction mixture was purified by a flash chromatography on a silical gel with ethyl acetate and the solvent was removed under reduced pressure. The ee value was determined by chiral HPLC analysis of the chiral amino alcohol directly. The characterization data of compounds **2a-2n** are in accordance with the reported data in the literature.<sup>6,9-12</sup>

#### (*S*)-2-(Benzyl(methyl)amino)-1-phenylethanol (**2a**)

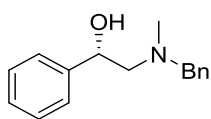

Light yellow oil; >99% yield; >99% ee. The enantiomeric excess was determined by HPLC on Chiralcel OJ-H column, 210 nm, 25 °C, *n*-hexane: *i*-PrOH = 95:5; flow 1.0 mL/min; *t<sub>R</sub>* (major) = 14.3 min, *t<sub>R</sub>* (minor) = 16.8 min. [ $\alpha$ ]<sub>D</sub><sup>25</sup> = 50.6 (*c* 1.0, EtOH). <sup>1</sup>H NMR (400 MHz, CDCl<sub>3</sub>)  $\delta$  7.28-7.16 (m, 10H), 4.67 (dd, *J* = 10.4, 3.6 Hz, 1H), 3.67 (d, *J* = 13.1 Hz, 1H), 3.46 (d, *J* = 13.1 Hz, 1H), 2.53-2.43 (m, 2H), 2.24 (s, 3H). <sup>13</sup>C NMR (101 MHz, CDCl<sub>3</sub>)  $\delta$  142.16, 138.17, 129.11, 128.46, 127.52, 127.39, 125.94, 69.39, 65.50, 62.38, 41.75.

#### (*S*)-2-(Benzyl(methyl)amino)-1-(3-methylphenyl)ethanol (**2b**)

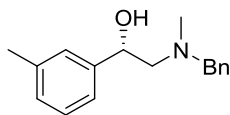

Light yellow oil; >99% yield; >99% ee. The enantiomeric excess was determined by HPLC on Chiracel OJ-H column, 210 nm, 25 °C, *n*-hexane: *i*-PrOH = 95:5; flow 1.0 mL/min;  $t_R$  (major) = 11.3 min,  $t_R$  (minor) = 12.8 min.  $[\alpha]_D^{25} = 22.4$  (*c* 0.5, EtOH).  $^1\text{H NMR}$  (400 MHz,  $\text{CDCl}_3$ )  $\delta$  7.43-7.24 (m, 5H), 7.23-7.03 (m, 4H), 4.72 (dd,  $J = 10.5, 3.4$  Hz, 1H), 3.74 (d,  $J = 13.1$  Hz, 1H), 3.53 (d,  $J = 13.1$  Hz, 1H), 2.58-2.50 (m, 1H), 2.34 (s, 3H), 2.31 (s, 3H).  $^{13}\text{C NMR}$  (101 MHz,  $\text{CDCl}_3$ )  $\delta$  142.08, 138.02, 129.12, 127.38, 126.58, 123.03, 69.39, 65.56, 62.39, 41.71, 21.51.

**(S)-2-(Benzyl(methyl)amino)-1-(4-methylphenyl)ethanol (2c)**

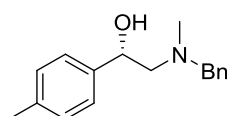

Light yellow oil; >99% yield; >99% ee. The enantiomeric excess was determined by HPLC on Chiracel OJ-H column, 210 nm, 25 °C, *n*-hexane: *i*-PrOH = 85:15; flow 1.0 mL/min;  $t_R$  (major) = 7.7 min,  $t_R$  (minor) = 8.7 min.  $[\alpha]_D^{25} = 63.25$  (*c* 1.2, EtOH).  $^1\text{H NMR}$  (400 MHz,  $\text{CDCl}_3$ )  $\delta$  7.32-7.23 (m, 7H), 7.14 (d,  $J = 7.9$  Hz, 2H), 4.72 (dd,  $J = 10.5, 3.4$  Hz, 1H), 3.74 (d,  $J = 13.1$  Hz, 1H), 3.52 (d,  $J = 13.1$  Hz, 1H), 2.51-2.43 (m, 2H), 2.33 (s, 3H), 2.31 (s, 3H).  $^{13}\text{C NMR}$  (101 MHz,  $\text{CDCl}_3$ )  $\delta$  139.12, 138.18, 137.15, 129.11, 129.06, 128.44, 127.37, 125.90, 69.24, 65.56, 62.38, 41.73, 21.19.

**(S)-2-(Benzyl(methyl)amino)-1-(2-methoxyphenyl)ethanol (2d)**

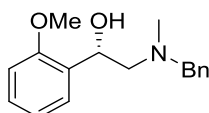

Light yellow oil; >99% yield; >99% ee. The enantiomeric excess was determined by HPLC on Chiracel OJ-H column, 210 nm, 25 °C, *n*-hexane: *i*-PrOH = 95:5; flow 1.0 mL/min;  $t_R$  (major) = 13.3 min,  $t_R$  (minor) = 15.3 min.  $[\alpha]_D^{25} = 84.08$  (*c* 1.2, EtOH).  $^1\text{H NMR}$  (400 MHz,  $\text{CDCl}_3$ )  $\delta$  7.52 (dd,  $J = 7.5, 1.3$  Hz, 1H), 7.42-7.18 (m, 6H), 6.97-6.95 (m, 1H), 6.83 (d,  $J = 8.2$  Hz, 1H), 5.16 (dd,  $J = 10.0, 3.1$  Hz, 3H), 3.87 (brs, 1H), 3.79 (s, 3H), 3.75 (d,  $J = 13.1$  Hz, 1H), 3.53 (d,  $J = 13.1$  Hz, 1H), 2.69 (dd,  $J = 12.3, 3.2$  Hz, 1H), 2.50-2.47 (m, 1H), 2.32 (s, 3H).  $^{13}\text{C NMR}$  (101 MHz,  $\text{CDCl}_3$ )  $\delta$  156.25, 138.21, 130.39, 129.22, 128.38, 128.11, 127.29, 126.51, 120.81, 110.07, 64.49, 63.44, 62.16, 55.30, 41.97.

**(S)-2-(Benzyl(methyl)amino)-1-(3-methoxyphenyl)ethanol (2e)**

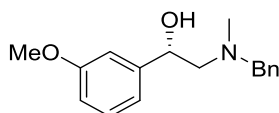

Light yellow oil; >99% yield; >99% ee. The enantiomeric excess was determined by HPLC on Chiracel OJ-H column, 210 nm, 25 °C, *n*-hexane: *i*-PrOH = 85:15; flow 1.0 mL/min;  $t_R$  (major) = 10.9 min,  $t_R$  (minor) = 11.5 min.  $[\alpha]_D^{25} = 44.40$  (*c* 0.5, EtOH).  $^1\text{H NMR}$  (400 MHz,  $\text{CDCl}_3$ )  $\delta$  7.39-7.32 (m, 3H), 7.31-7.19 (m, 3H), 6.93-6.90 (m, 2H), 6.82-6.79 (m, 1H), 4.73 (dd,  $J = 10.2, 3.7$  Hz, 1H), 3.80 (s, 3H), 3.74 (d,  $J = 13.1$  Hz, 1H), 3.53 (d,  $J = 13.1$  Hz, 1H), 2.60-2.51 (m, 2H), 2.31 (s, 3H).  $^{13}\text{C NMR}$  (101 MHz,  $\text{CDCl}_3$ )  $\delta$  159.73, 143.94, 138.15, 129.36, 129.11, 128.45, 127.38, 118.22, 113.13, 111.17, 69.27, 65.41, 62.36, 55.24, 41.74.

**(S)-2-(Benzyl(methyl)amino)-1-(4-methoxyphenyl)ethanol (2f)**

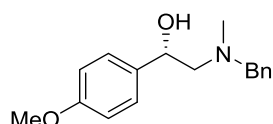

Light yellow oil; 99% yield; >99% ee. The enantiomeric excess was determined by HPLC on Chiracel OJ-H column, 220 nm, 25 °C, *n*-hexane: *i*-PrOH = 85:15; flow 1.0 mL/min;  $t_R$  (major) = 14.6 min,  $t_R$  (minor) = 17.7 min.  $[\alpha]_D^{25} = 46.40$  (*c* 1.0, EtOH).  $^1\text{H NMR}$  (400 MHz,  $\text{CDCl}_3$ )  $\delta$  7.36-7.28 (m, 7H), 6.92-6.85 (m, 2H), 4.70 (dd,  $J = 10.6, 3.3$  Hz, 1H), 3.79 (d,  $J = 5.6$  Hz, 3H), 3.81-3.72 (m, 1H), 3.53 (d,  $J = 13.1$  Hz, 1H), 2.62-2.56 (m, 1H), 2.48 (dd,  $J = 12.4, 3.4$  Hz, 1H), 2.31 (s, 3H).  $^{13}\text{C NMR}$  (101 MHz,  $\text{CDCl}_3$ )  $\delta$  159.04, 138.22, 134.16, 129.09, 128.43, 127.35, 127.20, 113.76, 69.02, 65.52, 62.38, 55.30, 41.74.

**(S)-2-(benzyl(methyl)amino)-1-(3-fluorophenyl)ethanol (2g)**

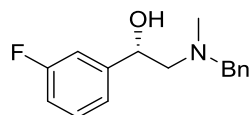

Light yellow oil; >99% yield; >99% ee. The enantiomeric excess was determined by HPLC on Chiracel OJ-H column, 210 nm, 25 °C, *n*-hexane: *i*-PrOH = 97:3; flow 1.0 mL/min;  $t_R$  (major) = 15.2 min,  $t_R$  (minor) = 16.2 min.  $[\alpha]_D^{25} = 48.80$  (*c* 1.0, EtOH).  $^1\text{H NMR}$  (400 MHz,  $\text{CDCl}_3$ )  $\delta$  7.45-7.21 (m, 6H), 7.10-7.08 (m, 2H), 6.98-6.88 (m, 1H), 4.73 (dd,  $J = 8.7, 5.3$  Hz, 1H), 3.74 (d,  $J = 13.0$  Hz, 1H), 3.53 (d,  $J = 13.1$  Hz, 1H), 2.56-2.52 (m, 2H), 2.32 (s, 3H).  $^{13}\text{C NMR}$  (101 MHz,  $\text{CDCl}_3$ )  $\delta$  162.99 (d,  $J = 246.4$  Hz), 144.99 (d,  $J = 7.1$  Hz), 137.99, 129.08, 128.48, 127.46, 121.41 (d,  $J = 7.1$  Hz), 114.28 (d,  $J = 22.22$  Hz), 112.81 (d,  $J = 22.22$  Hz), 68.80, 65.20, 62.34, 41.75.

**(S)-2-(Benzyl(methyl)amino)-1-(2-chlorophenyl)ethanol (2h)**

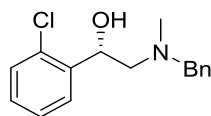

Light yellow oil; >99% yield; >99% ee. The enantiomeric excess was determined by HPLC on Chiracel AD-H column, 210 nm, 25 °C, *n*-hexane: *i*-PrOH = 98:2; flow 0.3 mL/min;  $t_R$  (minor) = 32.9 min,  $t_R$  (major) = 36.0 min.  $[\alpha]_D^{25} = 100.1$  (*c* 1.0, EtOH).  $^1\text{H NMR}$  (400 MHz,  $\text{CDCl}_3$ )  $\delta$

7.54 (dd,  $J = 7.7, 1.3$  Hz, 1H), 7.34-7.07 (m, 8H), 5.10 (dd,  $J = 10.3, 2.9$  Hz, 1H), 3.92 (brs, 1H), 3.69 (d,  $J = 13.1$  Hz, 1H), 3.44 (d,  $J = 13.1$  Hz, 1H), 2.68-2.65 (m, 1H), 2.35-2.32 (m, 1H), 2.26 (s, 3H).  $^{13}\text{C}$  NMR (101 MHz,  $\text{CDCl}_3$ )  $\delta$  139.57, 138.16, 131.72, 129.20, 129.13, 128.47, 128.42, 127.40, 127.34, 127.18, 66.49, 63.22, 62.25, 41.85.

**(S)-2-(Benzyl(methyl)amino)-1-(4-chlorophenyl)ethanol (2i)**

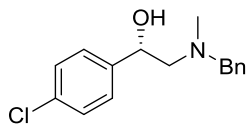

White solid; >99% yield; >99% ee. The enantiomeric excess was determined by HPLC on Chiralcel OJ-H column, 220 nm, 25 °C, *n*-hexane: *i*-PrOH = 85:15; flow 1.0 mL/min;  $t_{\text{R}}$  (major) = 7.8 min,  $t_{\text{R}}$  (minor) = 8.3 min.  $[\alpha]_{\text{D}}^{25} = 43.00$  (*c* 1.0, EtOH).  $^1\text{H}$  NMR (400 MHz,  $\text{CDCl}_3$ )  $\delta$  7.38-7.26 (m, 9H), 4.71 (dd,  $J = 9.6, 4.5$  Hz, 1H), 3.74 (d,  $J = 13.0$  Hz, 1H), 3.53 (d,  $J = 13.0$  Hz, 1H), 2.56-2.48 (m, 2H), 2.32 (s, 3H).  $^{13}\text{C}$  NMR (101 MHz,  $\text{CDCl}_3$ )  $\delta$  140.69, 138.01, 133.09, 129.08, 128.50, 128.48, 127.44, 127.27, 68.76, 65.29, 62.35, 41.75.

**(S)-2-(Benzyl(methyl)amino)-1-(3-bromophenyl)ethanol (2j)**

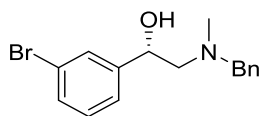

Colorless oil; >99% yield; >99% ee. The enantiomeric excess was determined by HPLC on Chiralcel OJ-H column, 210 nm, 25 °C, *n*-hexane: *i*-PrOH = 97:3; flow 1.0 mL/min;  $t_{\text{R}}$  (minor) = 18.2 min,  $t_{\text{R}}$  (major) = 20.2 min.  $[\alpha]_{\text{D}}^{25} = 29.41$  (*c* 1.0, EtOH).  $^1\text{H}$  NMR (400 MHz,  $\text{CDCl}_3$ )  $\delta$  7.52 (s, 1H), 7.42-7.23 (m, 7H), 7.19 (t,  $J = 7.7$  Hz, 1H), 4.70 (dd,  $J = 8.6, 5.4$  Hz, 1H), 3.73 (d,  $J = 13.1$  Hz, 1H), 3.53 (d,  $J = 13.1$  Hz, 1H), 2.60-2.49 (m, 2H), 2.31 (s, 3H).  $^{13}\text{C}$  NMR (101 MHz,  $\text{CDCl}_3$ )  $\delta$  144.63, 137.98, 130.54, 129.95, 129.08, 128.97, 128.49, 127.47, 124.50, 122.54, 68.76, 65.27, 62.35, 41.72.

**(S)-2-(Benzyl(methyl)amino)-1-(4-bromophenyl)ethanol (2k)**

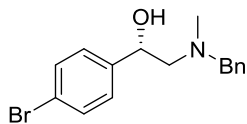

White solid; >99% yield; >99% ee. The enantiomeric excess was determined by HPLC on Chiralcel OJ-H column, 210 nm, 25 °C, *n*-hexane: *i*-PrOH = 95:5; flow 1.0 mL/min;  $t_{\text{R}}$  (major) = 16.1 min,  $t_{\text{R}}$  (minor) = 17.4 min.  $[\alpha]_{\text{D}}^{25} = 38.40$  (*c* 1.0, EtOH).  $^1\text{H}$  NMR (400 MHz,  $\text{CDCl}_3$ )  $\delta$  7.37 (d,  $J = 8.2$  Hz, 2H), 7.32-7.18 (m, 5H), 7.14 (d,  $J = 8.1$  Hz, 2H), 4.62 (dd,  $J = 9.1, 4.5$  Hz, 1H), 3.66 (d,  $J = 13.0$  Hz, 1H), 3.45 (d,  $J = 13.0$  Hz, 1H), 2.45-2.41 (m, 2H), 2.24 (s, 3H).  $^{13}\text{C}$  NMR

(101 MHz, CDCl<sub>3</sub>)  $\delta$  140.18, 136.91, 130.37, 127.41, 126.56, 126.38, 120.13, 67.73, 64.15, 61.27, 40.68.

**(S)-2-(tert-butylamino)-1-phenylethanol (2l)**

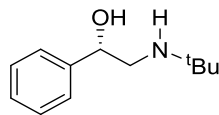

White solid; >99% yield; >99% ee. The enantiomeric excess was determined by HPLC on Chiracel AD-H column, 210 nm, 25 °C, *n*-hexane: *i*-PrOH = 85:15; flow 1.0 mL/min;  $t_R$  (major) = 12.5 min,  $t_R$  (minor) = 15.6 min. HPLC conditions (To the corresponding benzoyl derivatives).  $[\alpha]_D^{25} = 25.9$  (*c* 1.2, EtOH). <sup>1</sup>H NMR (400 MHz, CDCl<sub>3</sub>)  $\delta$  7.51-7.45 (m, 2H), 7.40-7.28 (m, 3H), 5.45 (dd, *J* = 10.6, 2.0 Hz, 1H), 3.24 (dd, *J* = 12.2, 2.3 Hz, 1H), 3.06 (dd, *J* = 12.0, 10.8 Hz, 1H), 1.51 (s, 9H). <sup>13</sup>C NMR (101 MHz, CDCl<sub>3</sub>)  $\delta$  139.87, 128.74, 128.29, 125.85, 68.74, 58.10, 49.66, 26.07.

**(R)-2-(benzyl(methyl)amino)-1-(thiophen-2-yl)ethanol (2m)**

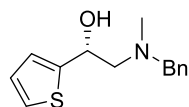

Colorless oil; >99% yield; >99% ee. The enantiomeric excess was determined by HPLC on Chiracel OJ-H column, 210 nm, 25 °C, *n*-hexane: *i*-PrOH = 95:5; flow 1.0 mL/min;  $t_R$  (minor) = 19.2 min,  $t_R$  (major) = 21.6 min.  $[\alpha]_D^{25} = 14.7$  (*c* 1.2, EtOH). <sup>1</sup>H NMR (400 MHz, CDCl<sub>3</sub>)  $\delta$  7.40-7.21 (m, 6H), 7.01-6.93 (m, 2H), 5.02 (dd, *J* = 10.4, 3.5 Hz, 1H), 3.73 (d, *J* = 13.0 Hz, 1H), 3.56 (d, *J* = 13.1 Hz, 1H), 2.77 (dd, *J* = 12.3, 10.4 Hz, 1H), 2.64 (dd, *J* = 12.4, 3.5 Hz, 1H), 2.30 (s, 3H). <sup>13</sup>C NMR (101 MHz, CDCl<sub>3</sub>)  $\delta$  145.78, 138.04, 129.09, 128.47, 127.42, 126.62, 124.46, 123.73, 65.94, 65.36, 62.38, 41.72.

**(R)-2-(benzyl(methyl)amino)-1-(pyridin-2-yl)ethanol (2n)**

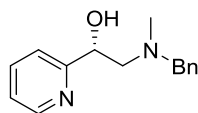

Light brown oil; 99% yield; >99% ee. The enantiomeric excess was determined by HPLC on Chiracel AS-H column, 210 nm, 25 °C, *n*-hexane: *i*-PrOH = 97:3; flow 1.0 mL/min;  $t_R$  (minor) = 12.9 min,  $t_R$  (major) = 17.3 min.  $[\alpha]_D^{25} = 80.8$  (*c* 1.2, EtOH). <sup>1</sup>H NMR (400 MHz, CDCl<sub>3</sub>)  $\delta$  8.52 (d, *J* = 4.4 Hz, 1H), 7.68 (td, *J* = 7.7, 1.7 Hz, 1H), 7.51 (d, *J* = 7.9 Hz, 1H), 7.37-7.22 (m, 5H), 7.17 (dd, *J* = 6.9, 5.4 Hz, 1H), 4.87 (dd, *J* = 9.8, 3.9 Hz, 1H), 3.73 (d, *J* = 13.1 Hz, 1H), 3.54 (d, *J* = 13.1 Hz, 1H), 2.81 (dd, *J* = 12.4, 3.9 Hz, 1H), 2.66 (dd, *J* = 12.4, 9.8 Hz, 1H), 2.32 (s, 3H). <sup>13</sup>C NMR (101 MHz, CDCl<sub>3</sub>)  $\delta$  161.72, 148.64, 138.35, 136.77, 129.06, 128.39, 127.28, 122.34, 120.42, 70.20, 63.83, 62.40, 41.87.

### (S)-3-(2-(benzyl(methyl)amino)-1-hydroxyethyl)phenol (**2o**)

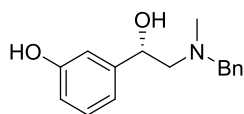

To a 4.0 mL vial was added the catalyst precursor  $[\text{Ir}(\text{COD})\text{Cl}]_2$  (1.4 mg,  $2.0 \times 10^{-3}$  mmol), ligand **L1** (2.4 mg,  $4.2 \times 10^{-3}$  mmol) and anhydrous *i*-PrOH (2.0 mL) under argon atmosphere. The mixture was stirred for 2.0 h at 25 °C giving orange red solution in the argon-filled glovebox. And then 0.2 mmol of  $\alpha$ -amino ketone **1o** (as a hydrochloride), *t*-BuOK (51.6 mg, 2.3 eq.) were added into a 5 mL hydrogenation vessel. 1 mL anhydrous *i*-PrOH was added as solvent and a solution of Ir/*f*-amphox **L1** in anhydrous *i*-PrOH (2  $\mu\text{L}$ ,  $c = 2.0 \times 10^{-3}$  mol/L) was added *via* an injection port. Then the vessel was placed in an autoclave, closed it, and moved out of the glovebox. The autoclave was quickly purged with hydrogen gas for three times, then pressurized to 40 atm  $\text{H}_2$ . The reaction solution was stirred at room temperature (25 °C - 30 °C) until for 12 h, then released pressure carefully. The reaction solution was treated with 2N HCl aqueous solution to adjust pH to ~7. the solvent was removed under reduced pressure and the residue was purified by a flash chromatography on a silical gel with ethyl acetate (1%  $\text{Et}_3\text{N}$ ) as eluent to afford **2o** as a white solid; >99% conv.; 97% yield; >99% ee. The enantiomeric excess was determined by HPLC on Chiracel OJ-H column, 210 nm, 25 °C, *n*-hexane: *i*-PrOH = 80:20; flow 1.0 mL/min;  $t_{\text{R}}$  (major) = 10.8 min,  $t_{\text{R}}$  (minor) = 15.9 min.  $[\alpha]_{\text{D}}^{25} = 50.7$  ( $c$  1.0, EtOH).  $^1\text{H}$  NMR (400 MHz,  $\text{CDCl}_3$ )  $\delta$  7.40-7.24 (m, 5H), 7.16 (t,  $J = 7.8$  Hz, 1H), 6.91 (s, 1H), 6.83 (d,  $J = 7.6$  Hz, 1H), 6.77-6.68 (m, 1H), 4.74 (dd,  $J = 10.3, 3.6$  Hz, 1H), 4.10 (brs, 2H), 3.77 (d,  $J = 13.1$  Hz, 1H), 3.57 (d,  $J = 13.1$  Hz, 1H), 2.59 (dt,  $J = 12.5, 5.4$  Hz, 2H), 2.33 (s, 3H).  $^{13}\text{C}$  NMR (101 MHz,  $\text{CDCl}_3$ )  $\delta$  156.17, 143.60, 137.47, 129.57, 129.25, 128.51, 127.56, 117.93, 114.69, 112.83, 69.16, 65.03, 62.18, 41.62.

### Asymmetric hydrogenation of $\alpha$ -amino ketone **1a** at S/C = 500 000:

To a 4.0 mL vial was added the catalyst precursor  $[\text{Ir}(\text{COD})\text{Cl}]_2$  (1.4 mg,  $2.0 \times 10^{-3}$  mmol), ligand **L1** (2.4 mg,  $4.2 \times 10^{-3}$  mmol) and anhydrous *i*-PrOH (2.0 mL) in the argon-filled glovebox. The mixture was stirred for 2.0 h at 25 °C giving orange red solution. The 10 mmol of  $\alpha$ -amino ketone **1a** (as a hydrochloride) and *t*-BuOK (13 mmol, 1.46 g) were added into a 10 ml hydrogenation vessel. 5 mL anhydrous *i*-PrOH was added as solvent and a solution of Ir/*f*-amphox **L1** in anhydrous *i*-PrOH (10  $\mu\text{L}$ ,  $2.0 \times 10^{-3}$  mol/L) was added via an injection port. Then the vessel was placed in an autoclave, closed it and moved it out from glovebox. The autoclave was quickly purged with hydrogen gas for three times, then pressurized to 50 atm  $\text{H}_2$ . The reaction solution was stirred at 30 °C until no obvious hydrogen pressure drop was observed (48 h), then released pressure carefully. The solvent of the reaction mixture was removed under reduced pressure and the residue was purified by a flash chromatography on a silical gel with ethyl acetate as eluent to



afford the chiral amino alcohol (*S*)-**2a** 2.38 g as a light yellow oil, >99% conversion, >99% yield, >99% ee (*S*).

#### 4. The Synthesis of (*S*)-Phenylephrine Hydrochloride at S/C=200 000.<sup>6,8,13</sup>

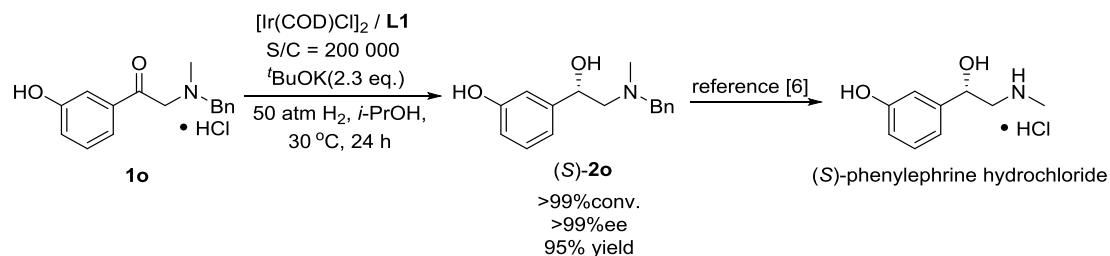

1.17 g (4 mmol) of amino ketone **1o** (as a hydrochloride) and 1.03 g (9.2 mmol) of *t*-BuOK were added into a 10 ml hydrogenation vessel. Then 4 mL of anhydrous *i*-PrOH and 10  $\mu\text{L}$  ( $2.0 \times 10^{-3}$  mol/L, 0.02  $\mu\text{mol}$ ) of the solution of Ir-L1 in anhydrous *i*-PrOH was added via an injection port. Then the vessel was placed in an autoclave, closed it and moved it out from golvebox. The autoclave was quickly purged with hydrogen gas for three times, then pressurized to 50 atm  $\text{H}_2$ . The reaction solution was stirred at 30 °C until no obvious hydrogen pressure drop was observed (24 h), then released pressure carefully. The reaction solution was treated with 2N HCl aqueous solution to adjust pH to ~7. The solvent was removed under reduced pressure and the residue was purified by a flash chromatography on a silical gel with ethyl acetate (1%  $\text{Et}_3\text{N}$ ) as eluent to afford (*S*)-**2o** 0.98 g as a white solid; >99% conv.; 95% yield; >99% ee. The enantiomeric excess was determined by HPLC on Chiracel OJ-H column, 210 nm, 25 °C, *n*-hexane: *i*-PrOH = 80:20; flow 1.0 mL/min;  $t_{\text{R}}$  (major) = 10.8 min,  $t_{\text{R}}$  (minor) = 15.9 min.  $[\alpha]_{\text{D}}^{25} = 50.7$  (*c* 1.0, EtOH).  $^1\text{H}$  NMR (400 MHz,  $\text{CDCl}_3$ )  $\delta$  7.40-7.24 (m, 5H), 7.16 (t,  $J = 7.8$  Hz, 1H), 6.91 (s, 1H), 6.83 (d,  $J = 7.6$  Hz, 1H), 6.77-6.68 (m, 1H), 4.74 (dd,  $J = 10.3, 3.6$  Hz, 1H), 4.10 (brs, 2H), 3.77 (d,  $J = 13.1$  Hz, 1H), 3.57 (d,  $J = 13.1$  Hz, 1H), 2.59 (dt,  $J = 12.5, 5.4$  Hz, 2H), 2.33 (s, 3H).  $^{13}\text{C}$  NMR (101 MHz,  $\text{CDCl}_3$ )  $\delta$  156.17, 143.60, 137.47, 129.57, 129.25, 128.51, 127.56, 117.93, 114.69, 112.83, 69.16, 65.03, 62.18, 41.62.

## 5. NMR spectra

### (S)-2-(Benzyl(methyl)amino)-1-phenylethanol (2a)

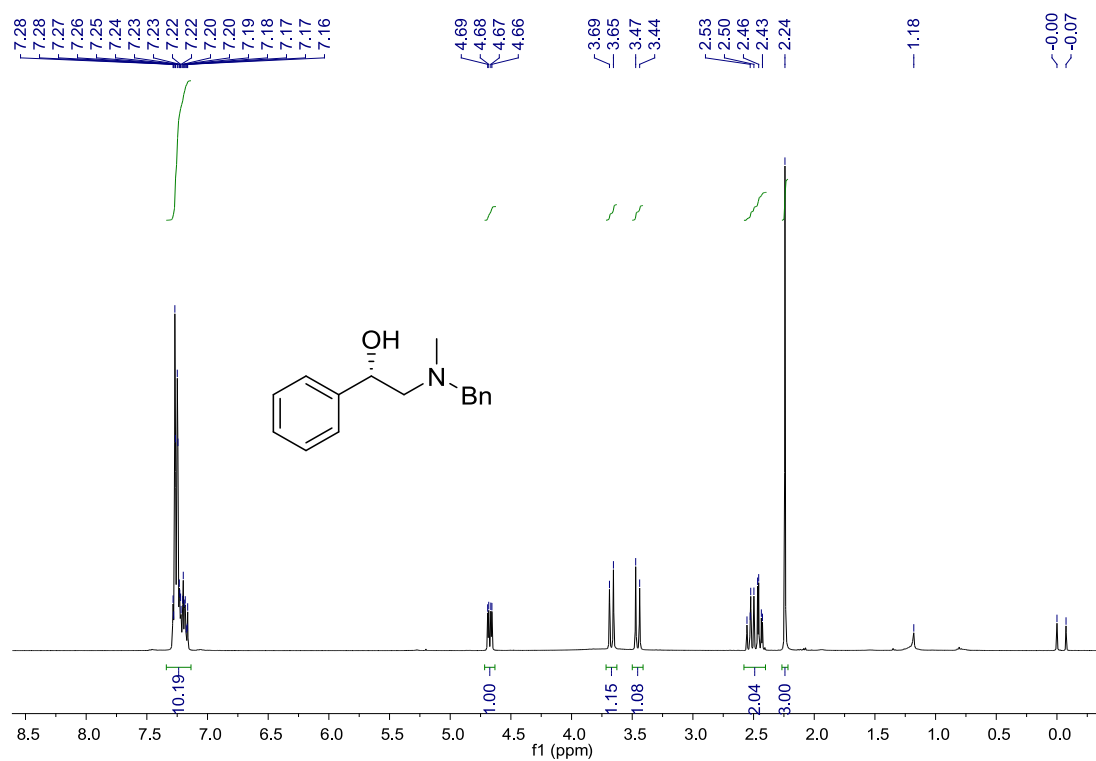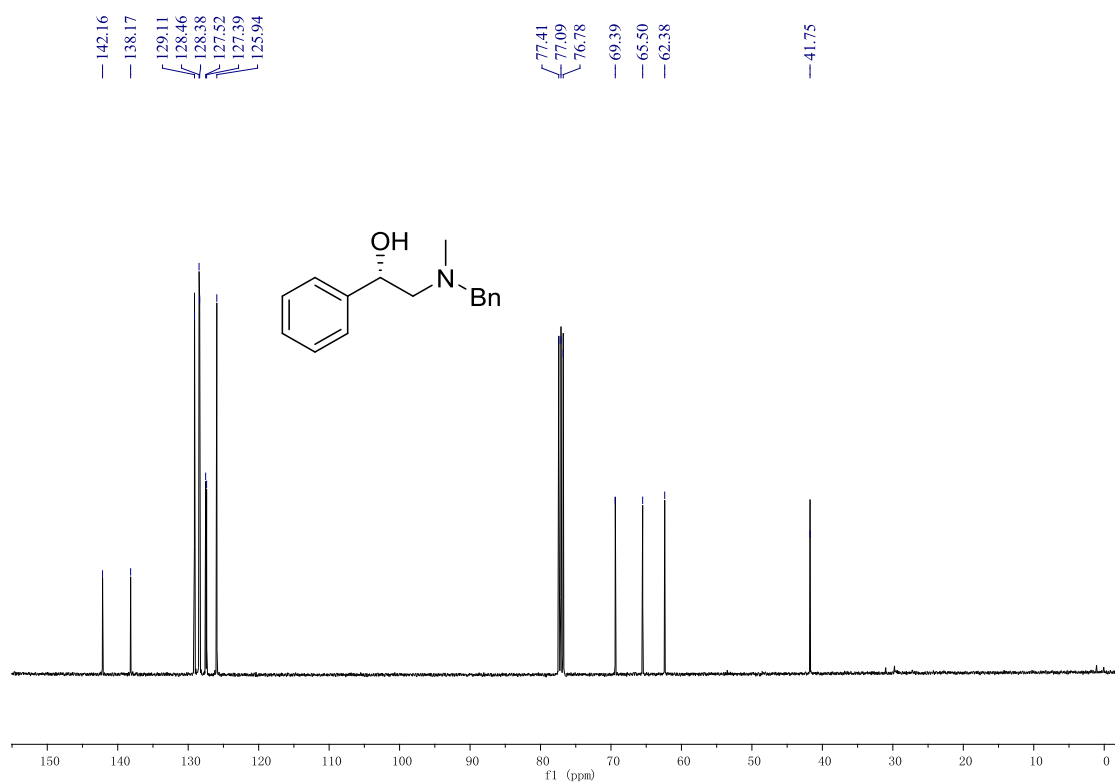

**(S)-2-(Benzyl(methyl)amino)-1-(3-methylphenyl)ethanol (2b)**

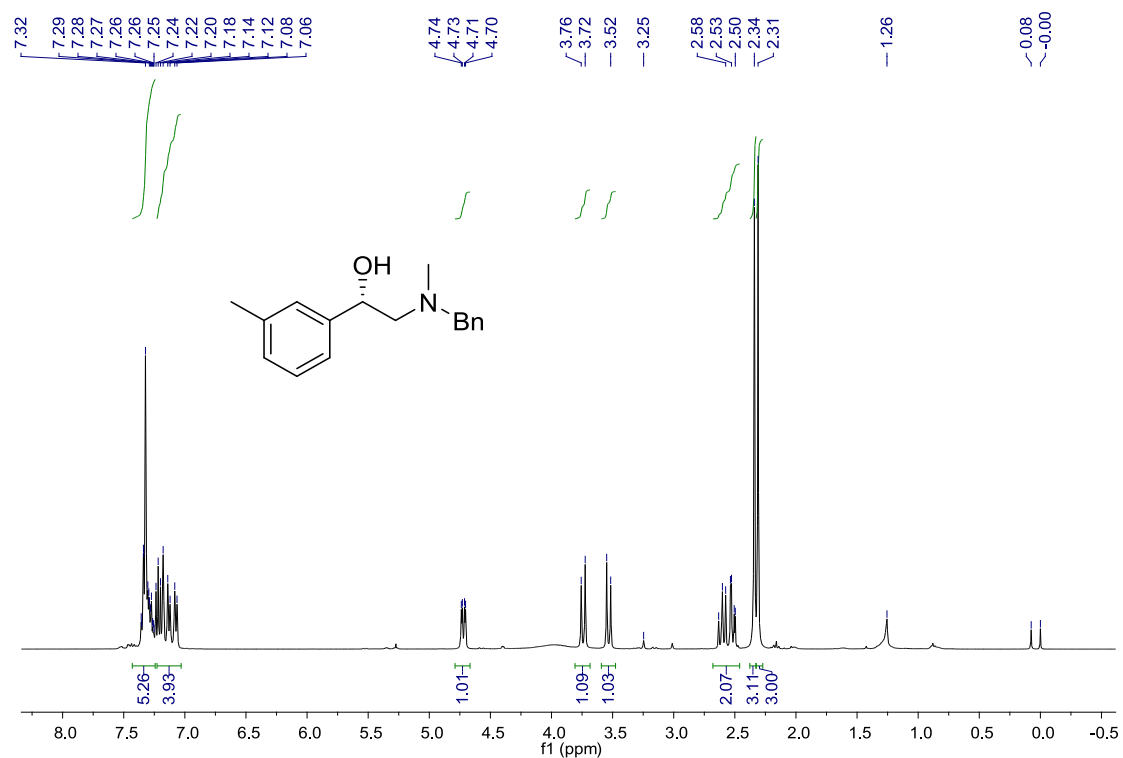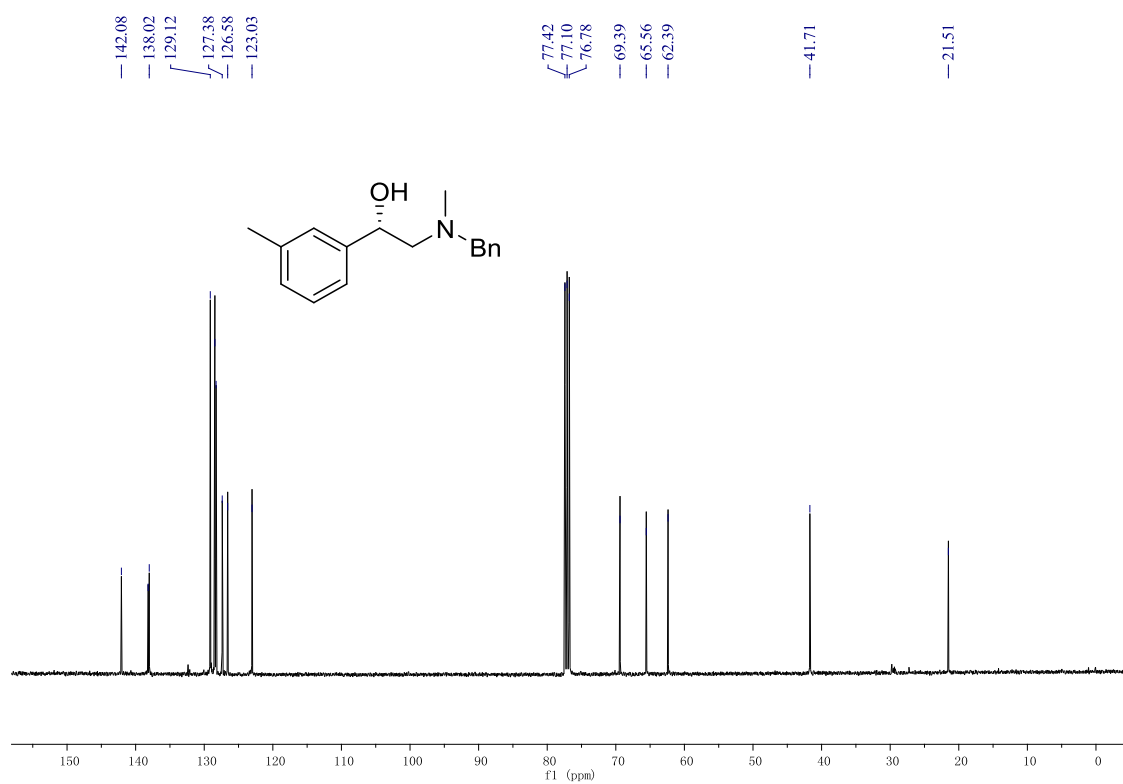

**(S)-2-(Benzyl(methyl)amino)-1-(4-methylphenyl)ethanol(2c)**

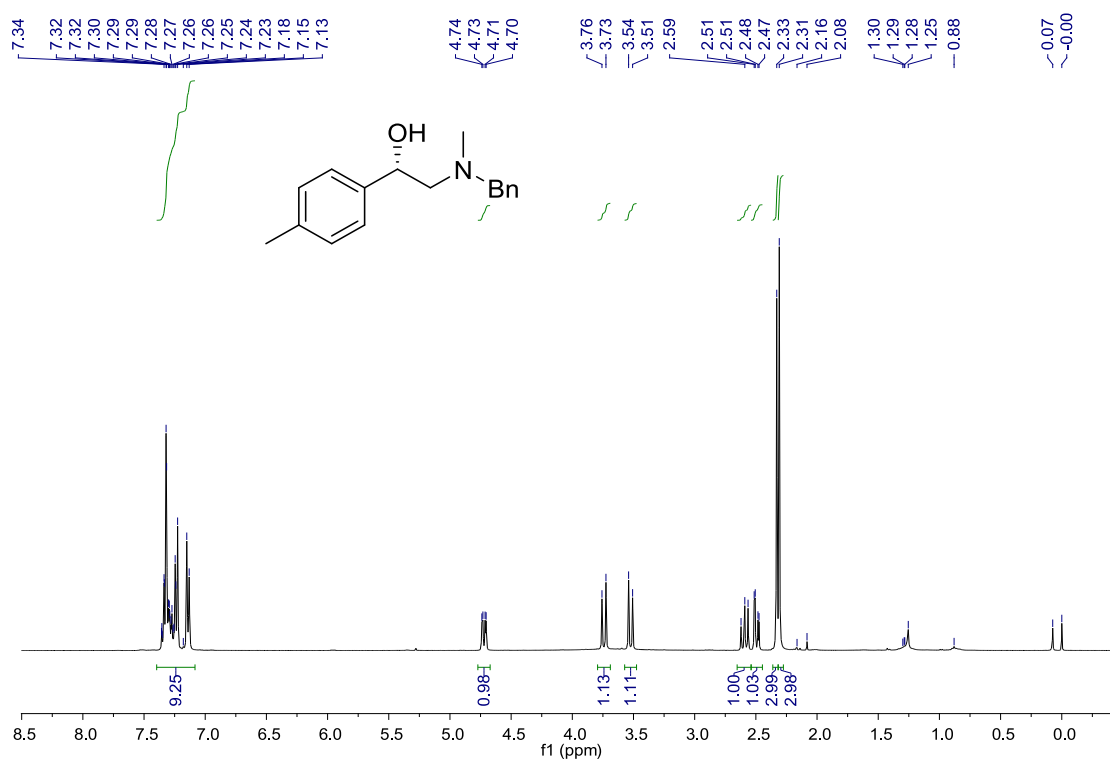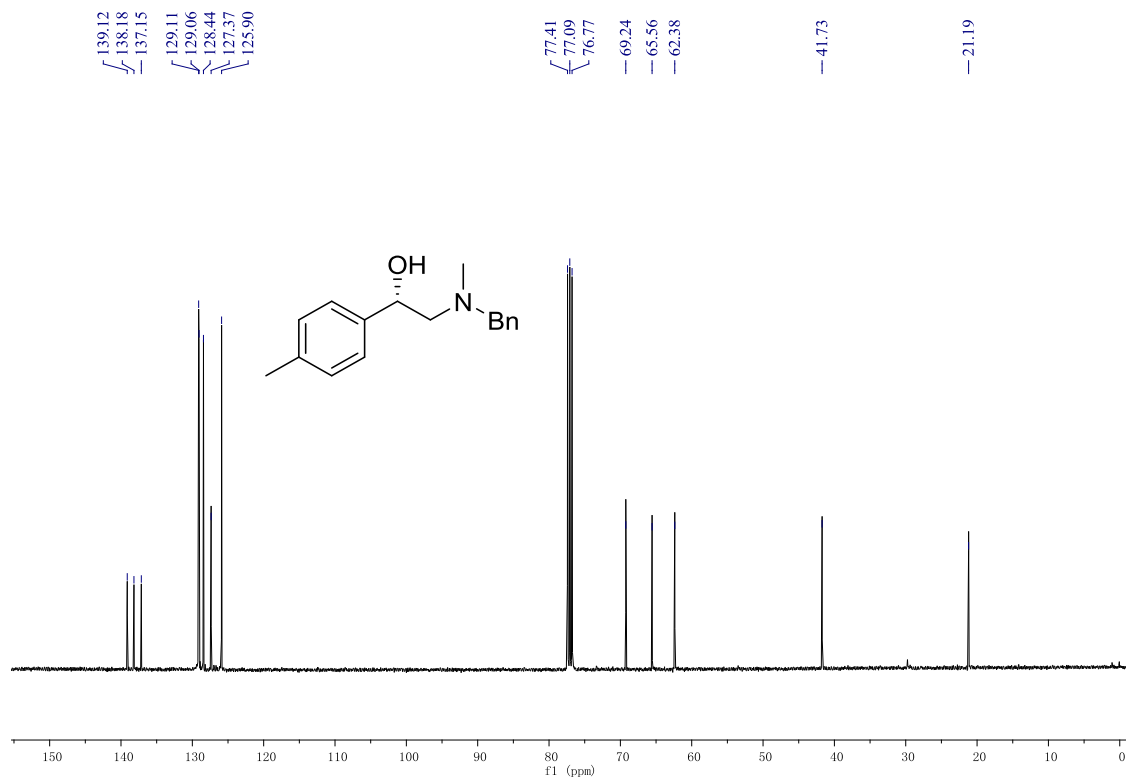

**(S)-2-(Benzyl(methyl)amino)-1-(2-methoxyphenyl)ethanol (2d)**

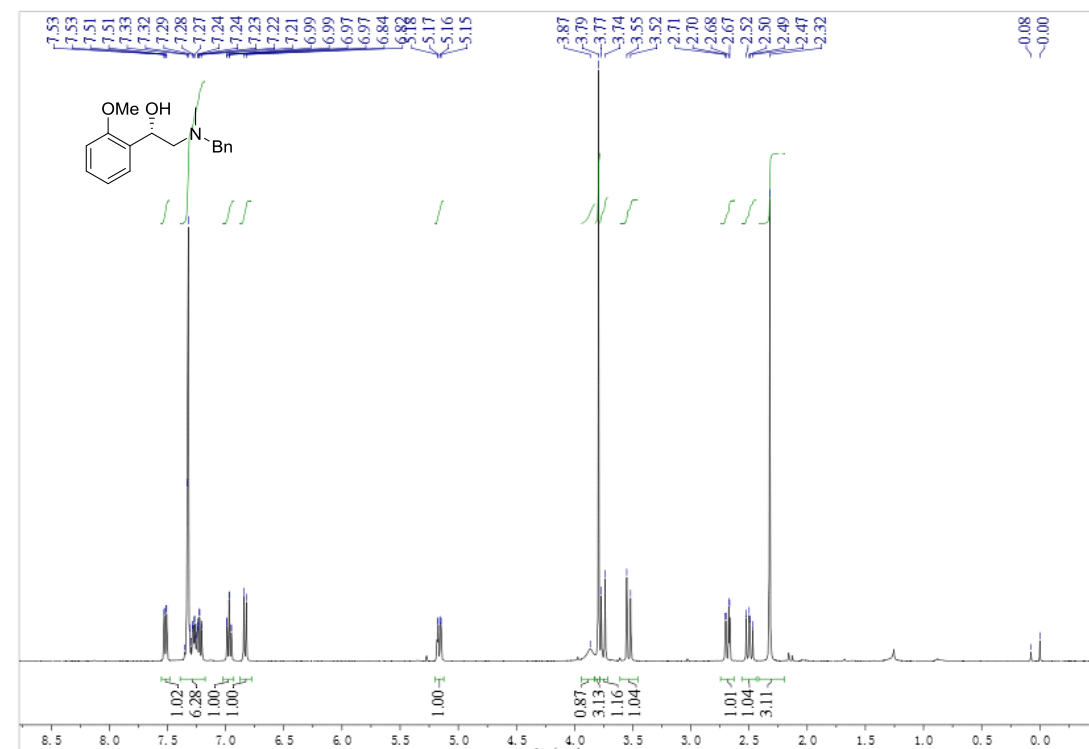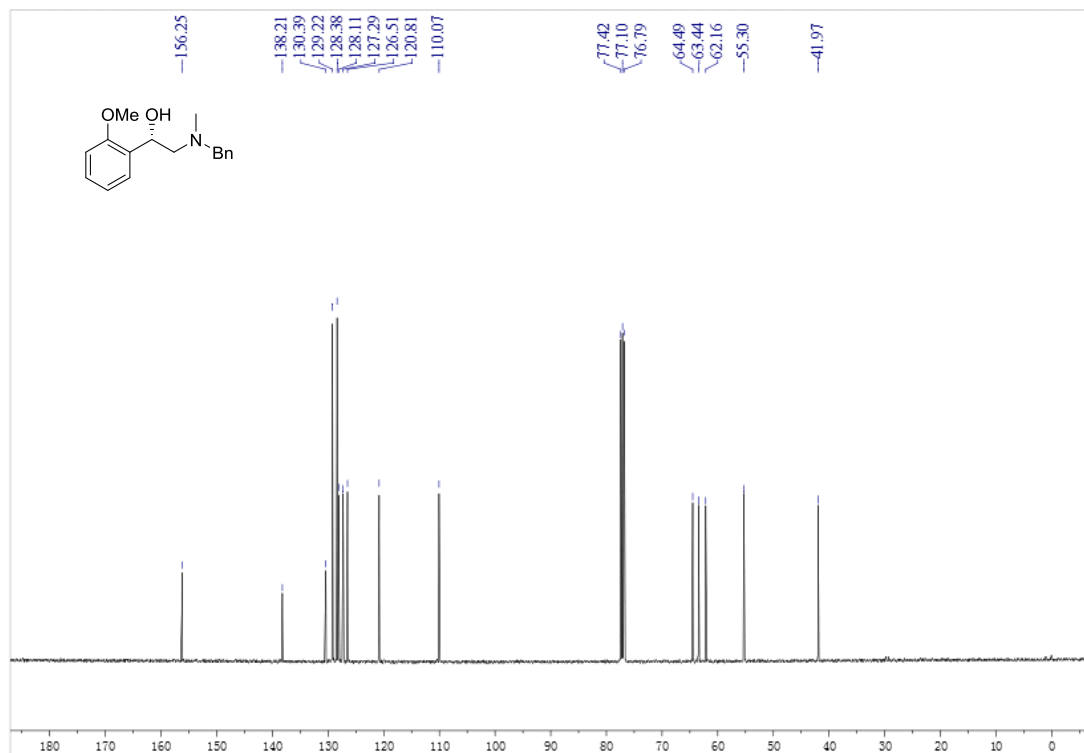

**(S)-2-(Benzyl(methyl)amino)-1-(3-methoxyphenyl)ethanol (2e)**

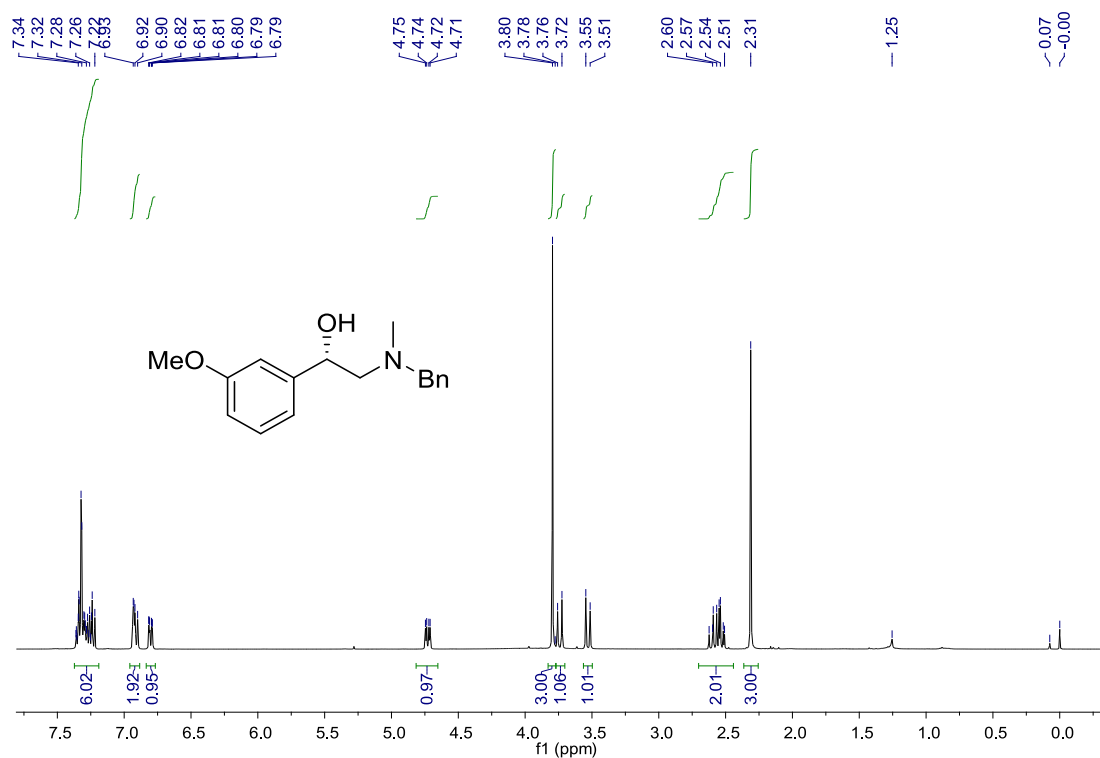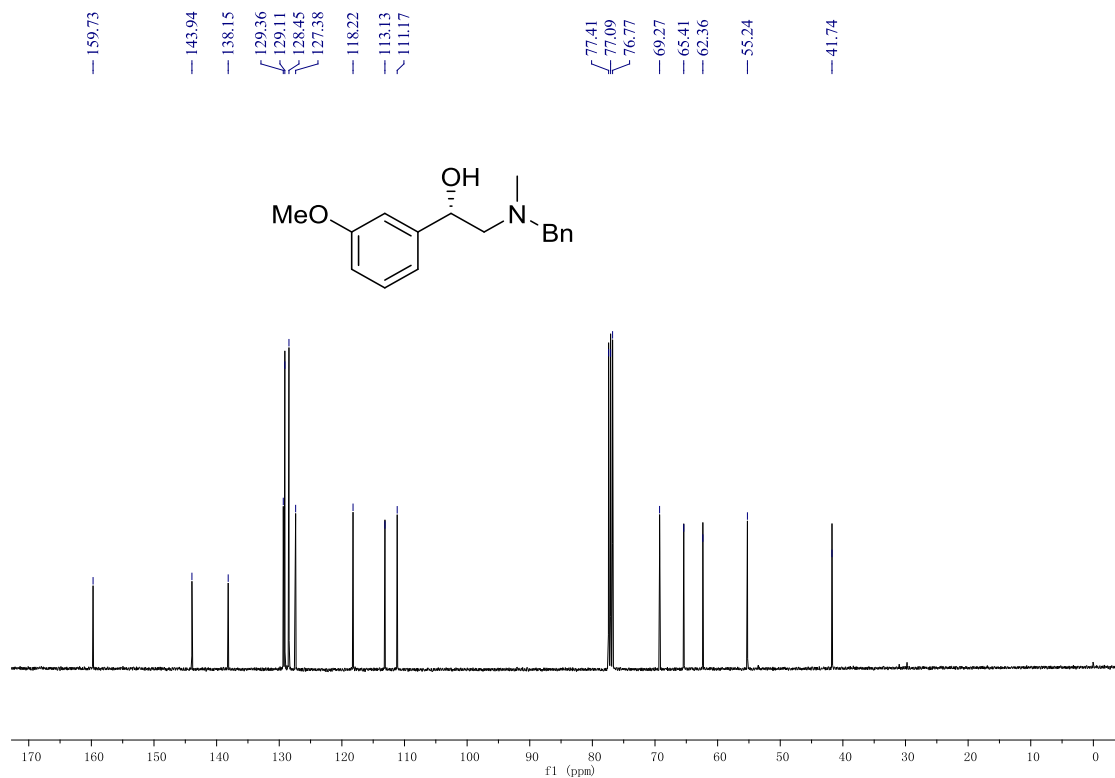

**(S)-2-(Benzyl(methyl)amino)-1-(4-methoxyphenyl)ethanol (2f)**

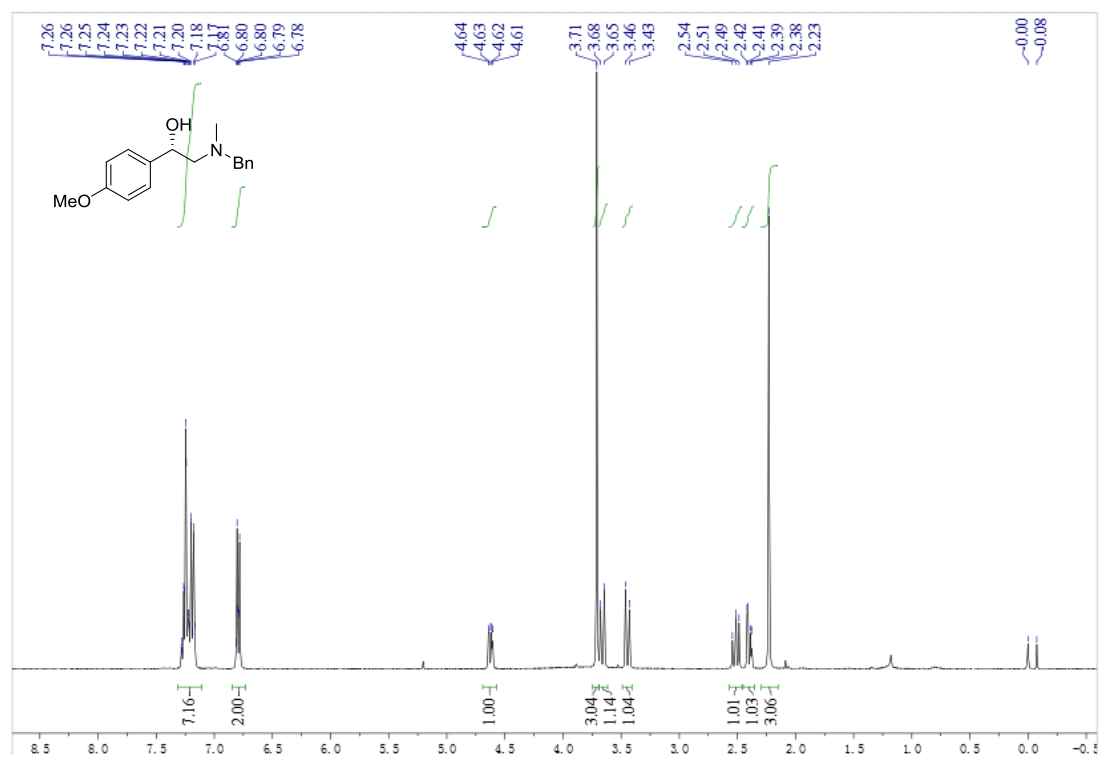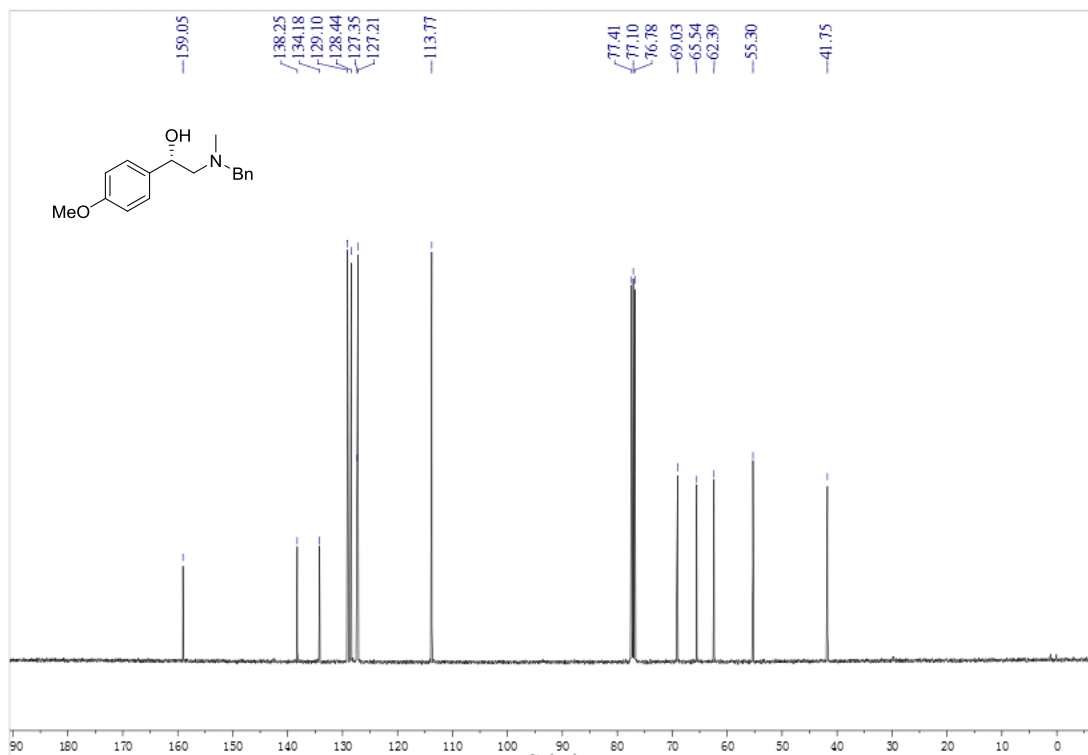

**(S)-2-(benzyl(methyl)amino)-1-(3-fluorophenyl)ethanol (2g)**

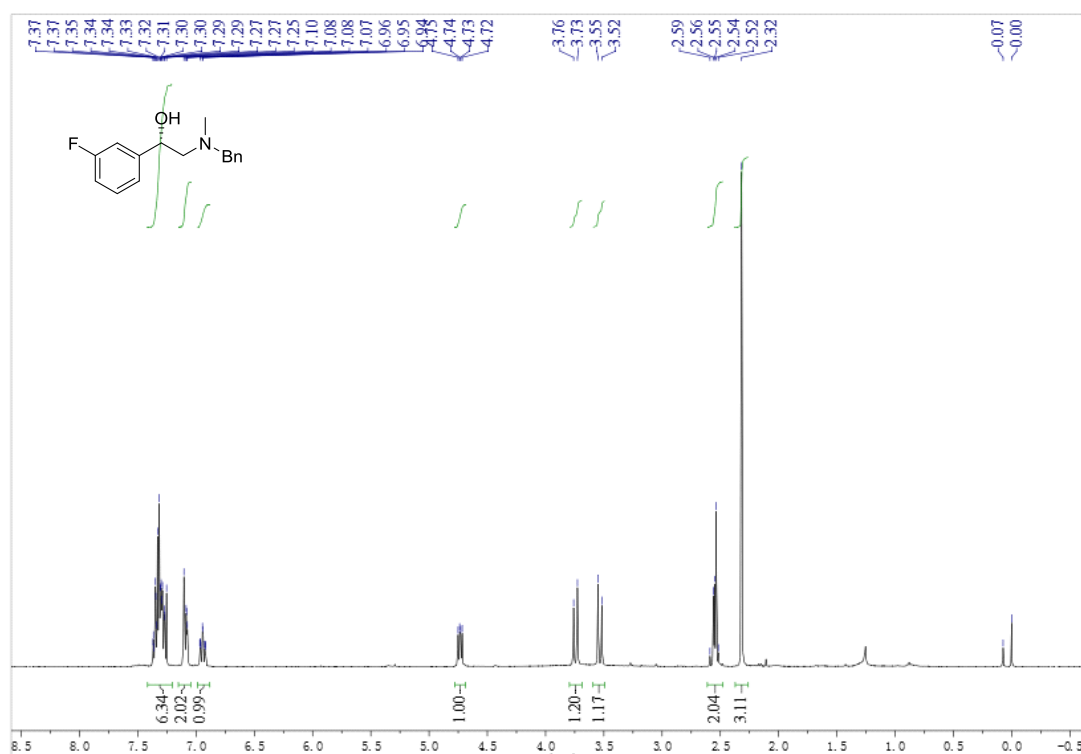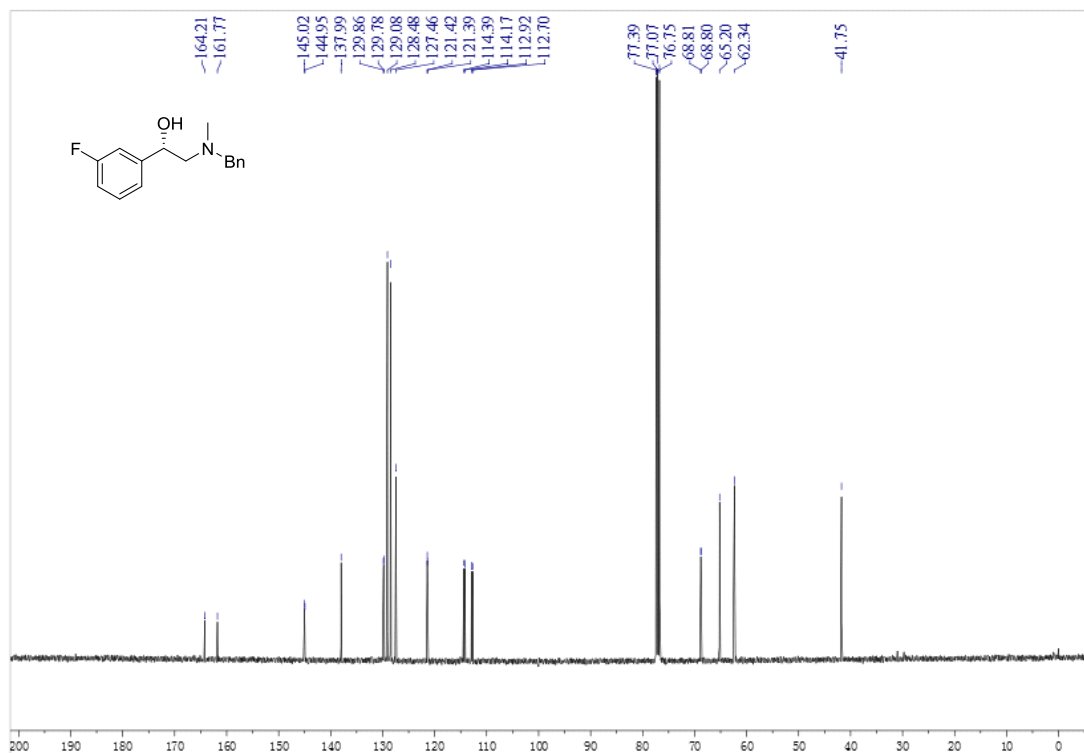



**(S)-2-(Benzyl(methyl)amino)-1-(2-chlorophenyl)ethanol (2h)**

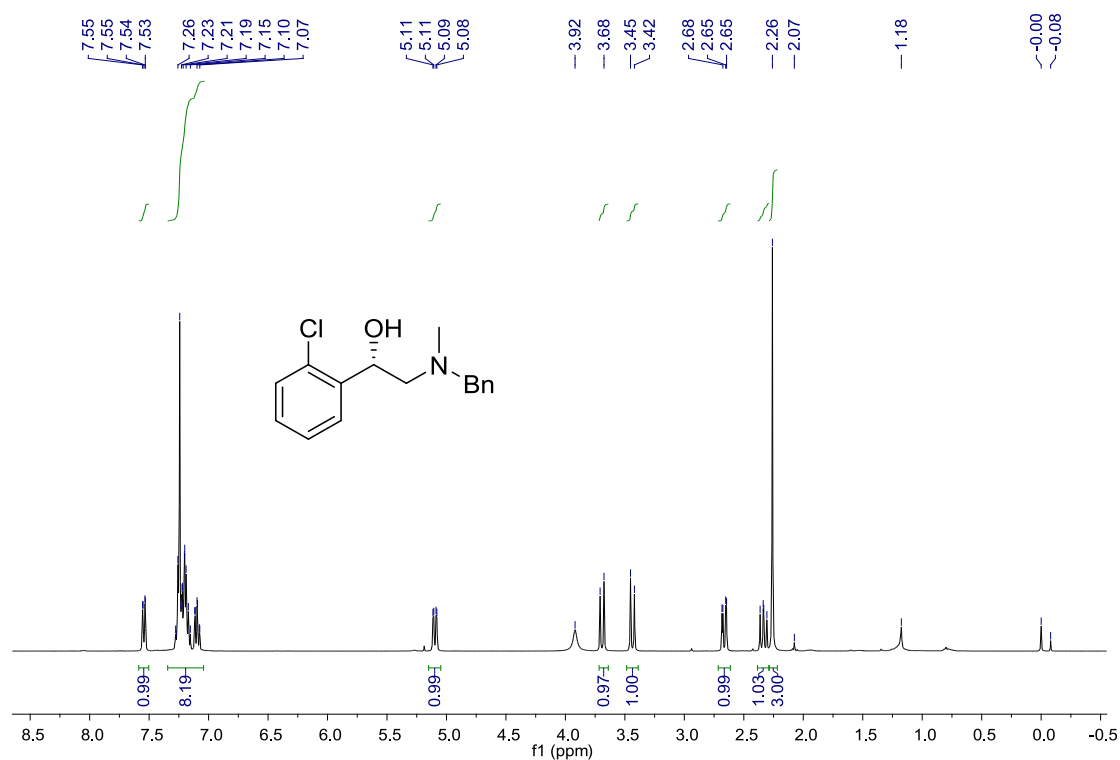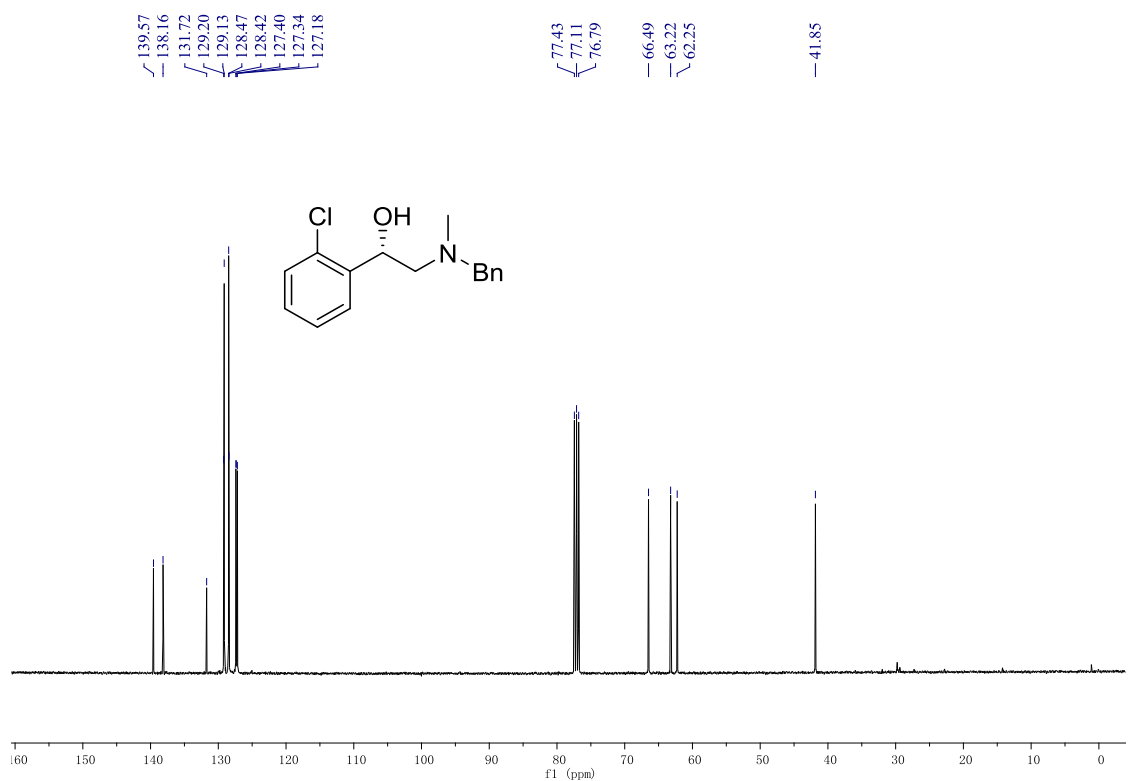

**(S)-2-(Benzyl(methyl)amino)-1-(4-chlorophenyl)ethanol (2i)**

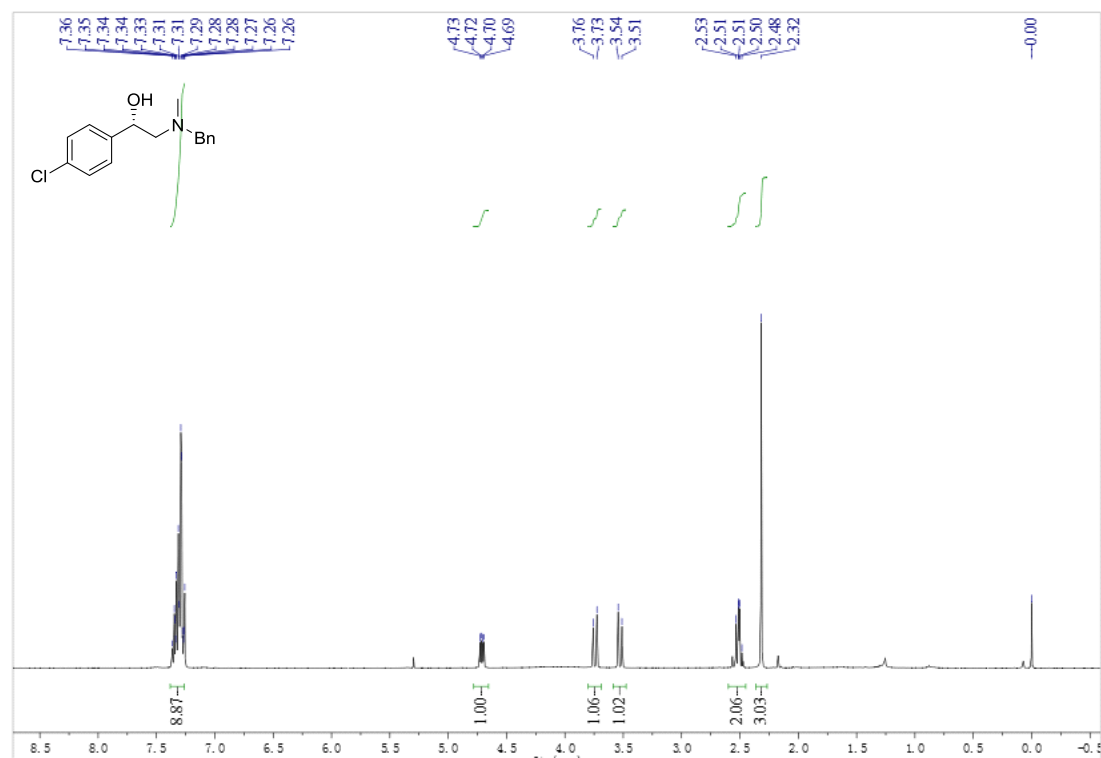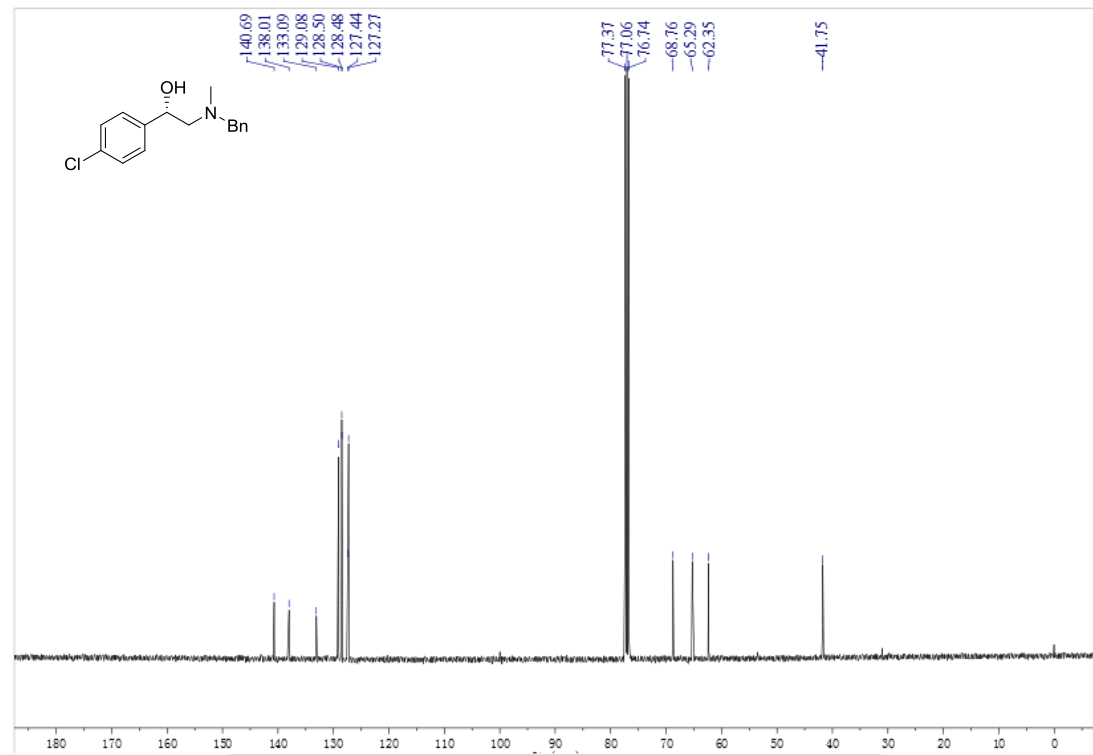

**(S)-2-(Benzyl(methyl)amino)-1-(3-bromophenyl)ethanol (2j)**

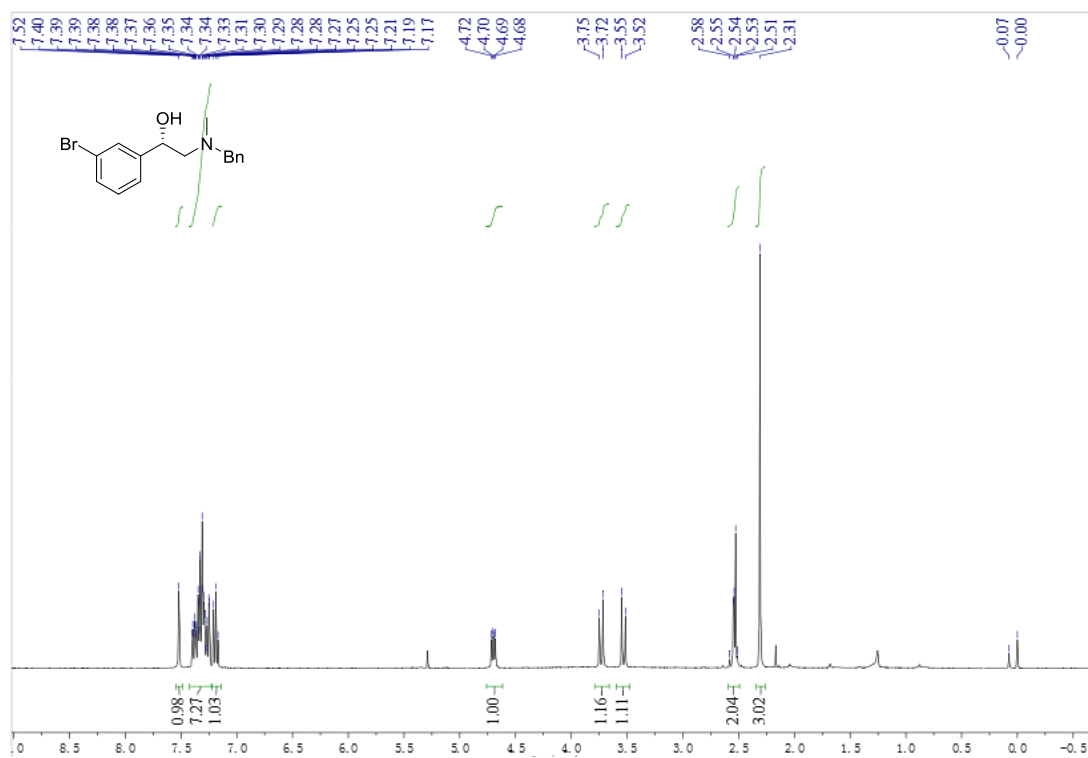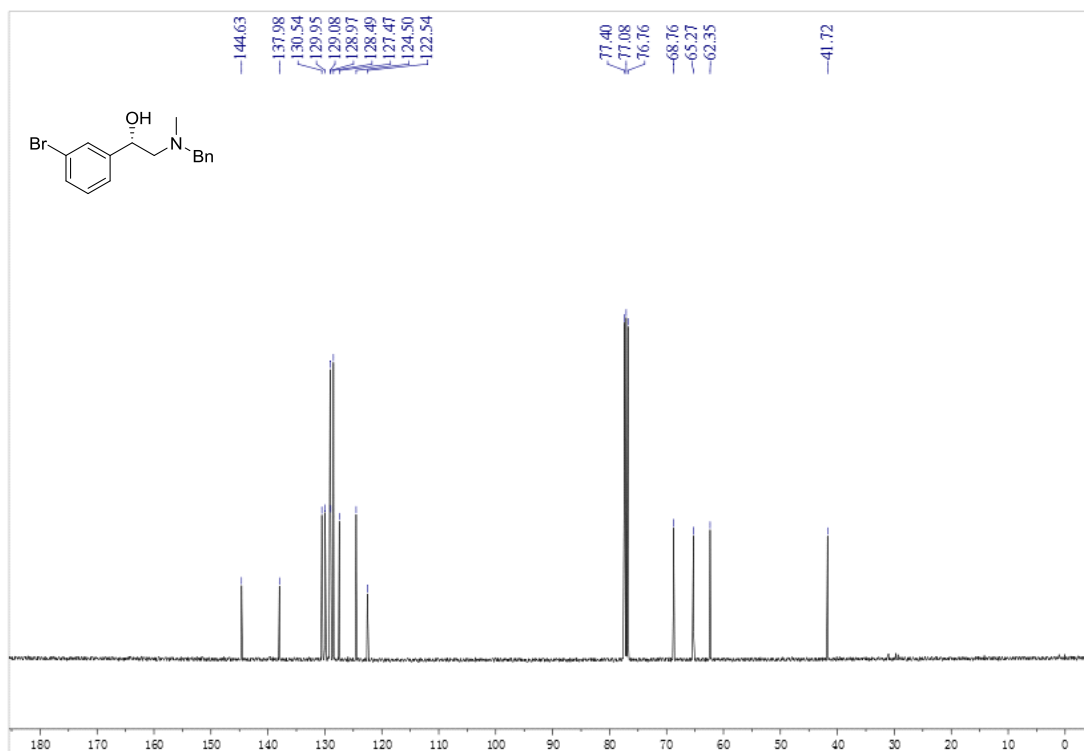

**(S)-2-(Benzyl(methyl)amino)-1-(4-bromophenyl)ethanol (2k)**

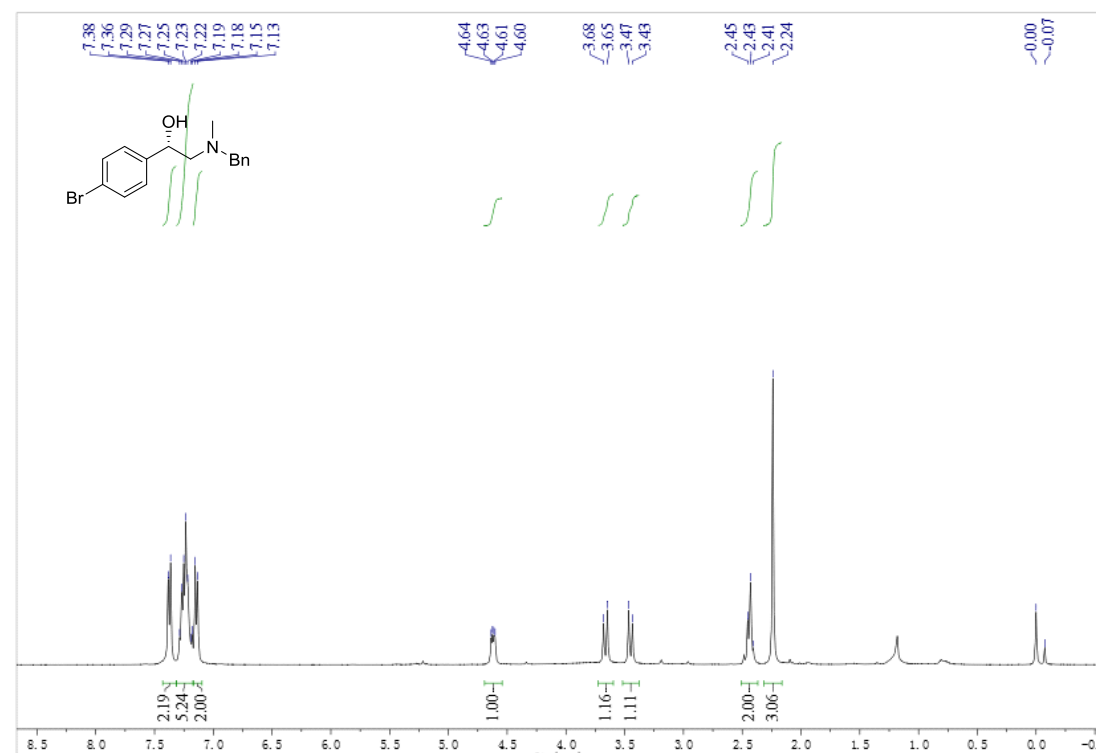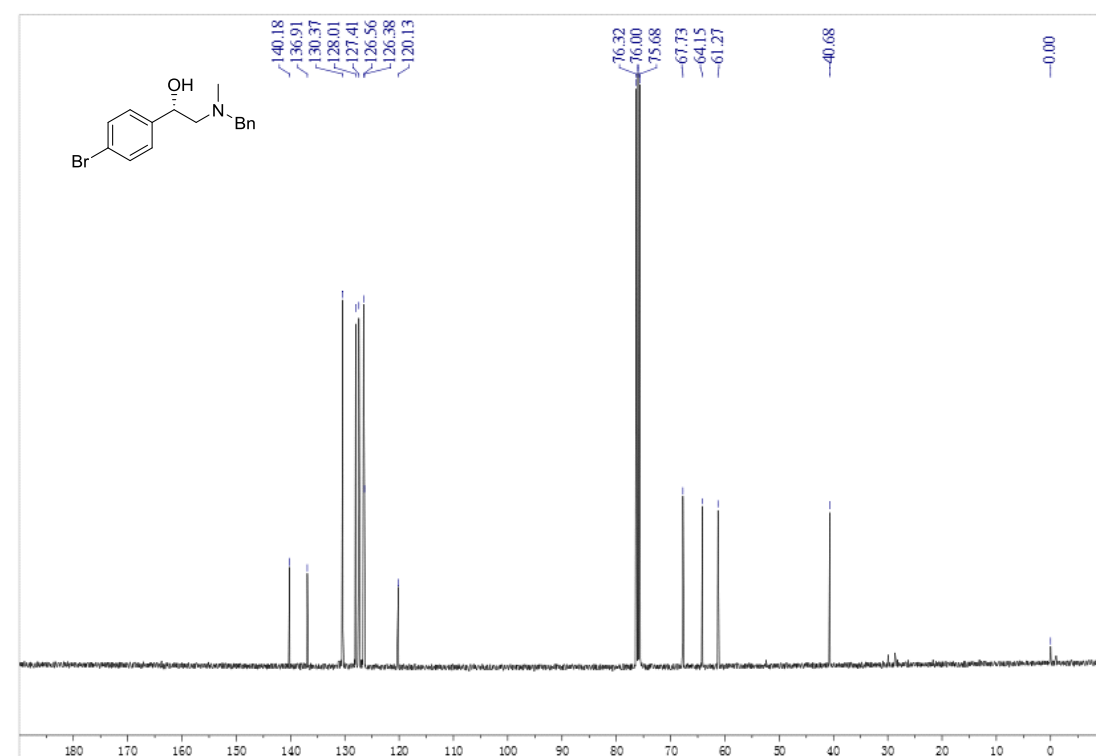

**(S)-2-(tert-butylamino)-1-phenylethanol (2l)**

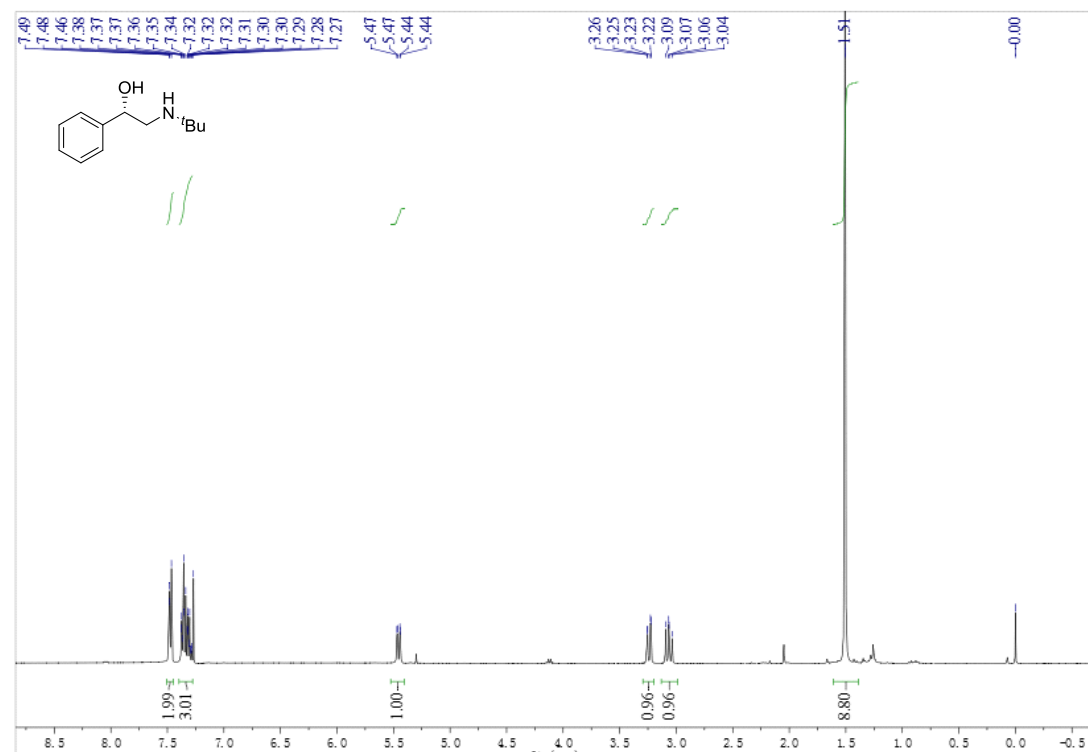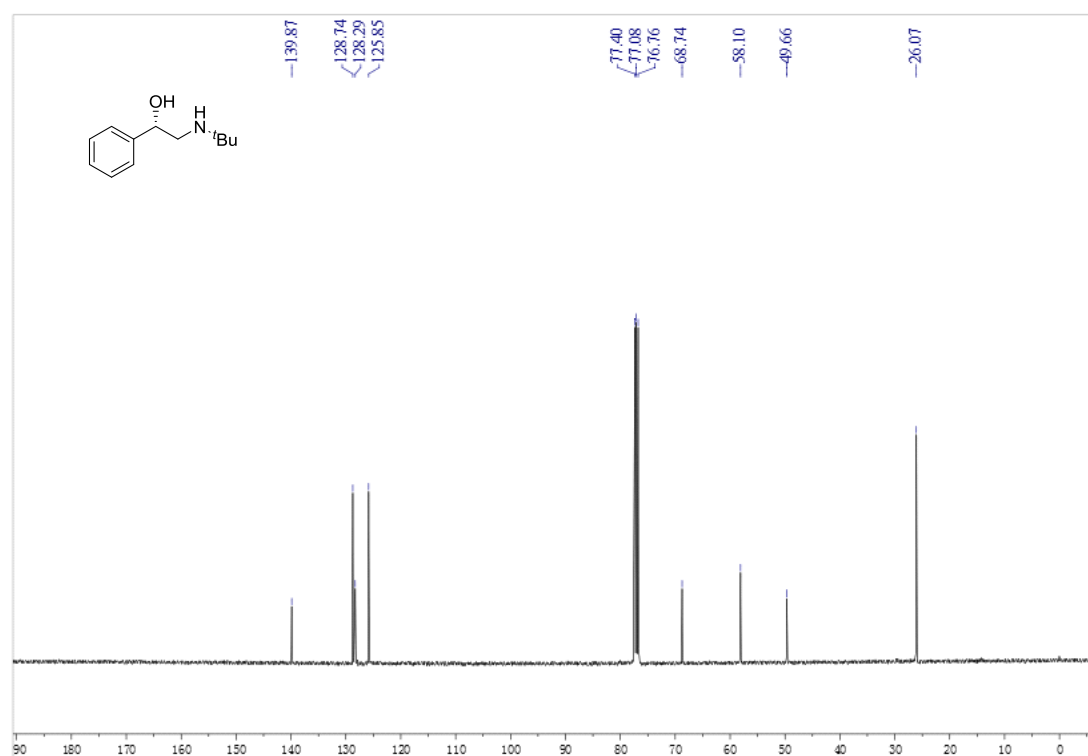

**(R)-2-(benzyl(methyl)amino)-1-(thiophen-2-yl)ethanol (2m)**

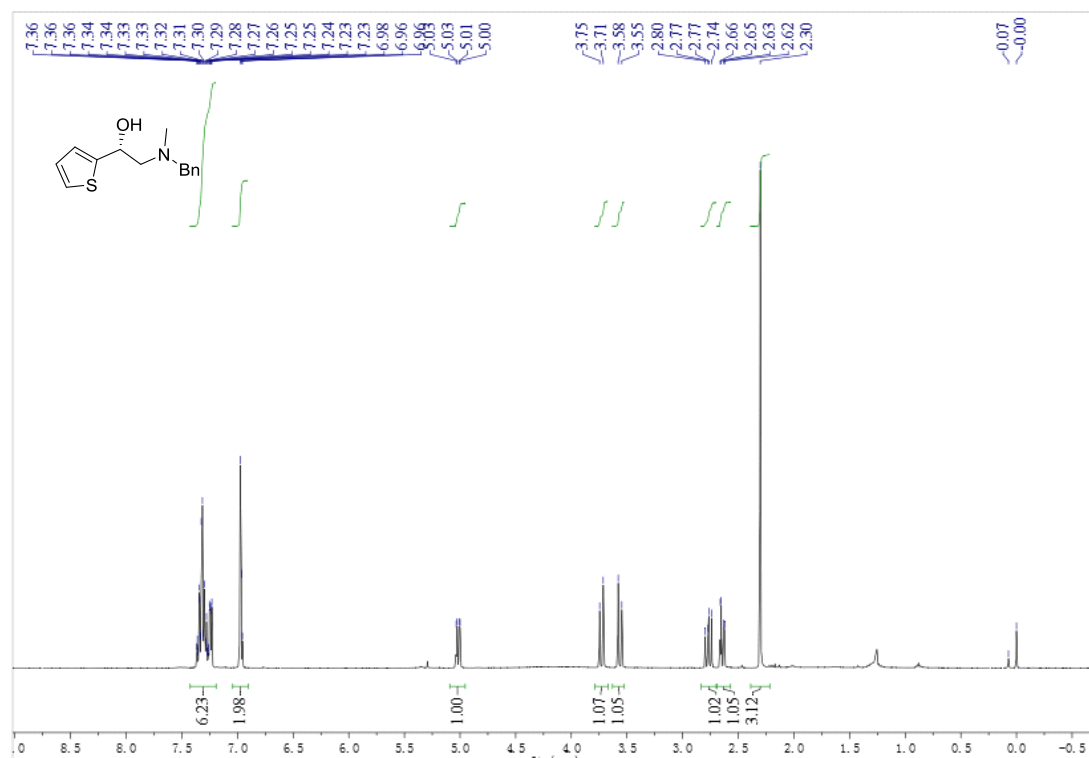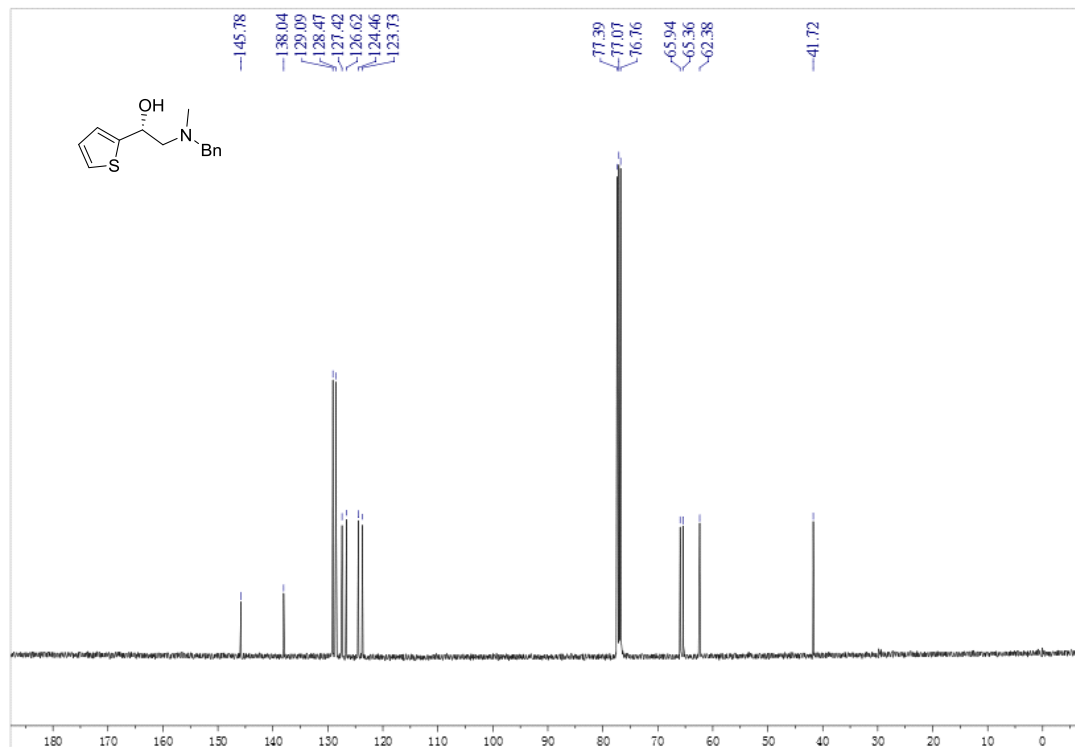

**(R)-2-(benzyl(methyl)amino)-1-(pyridin-2-yl)ethanol (2n)**

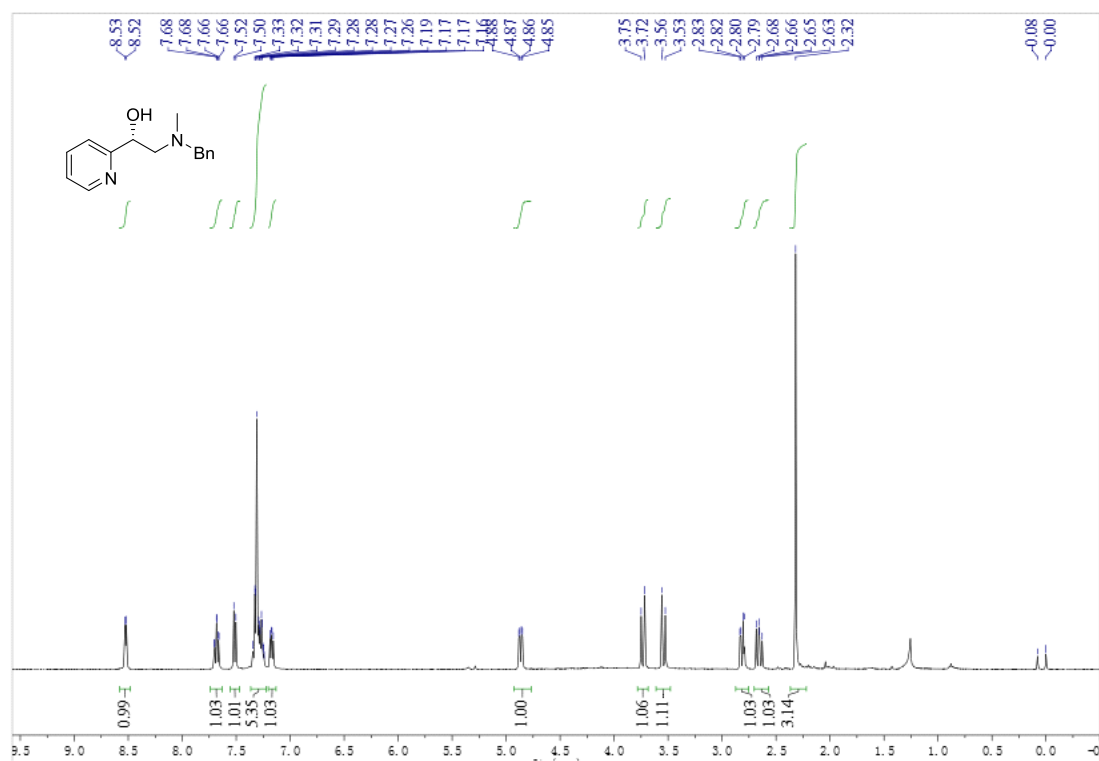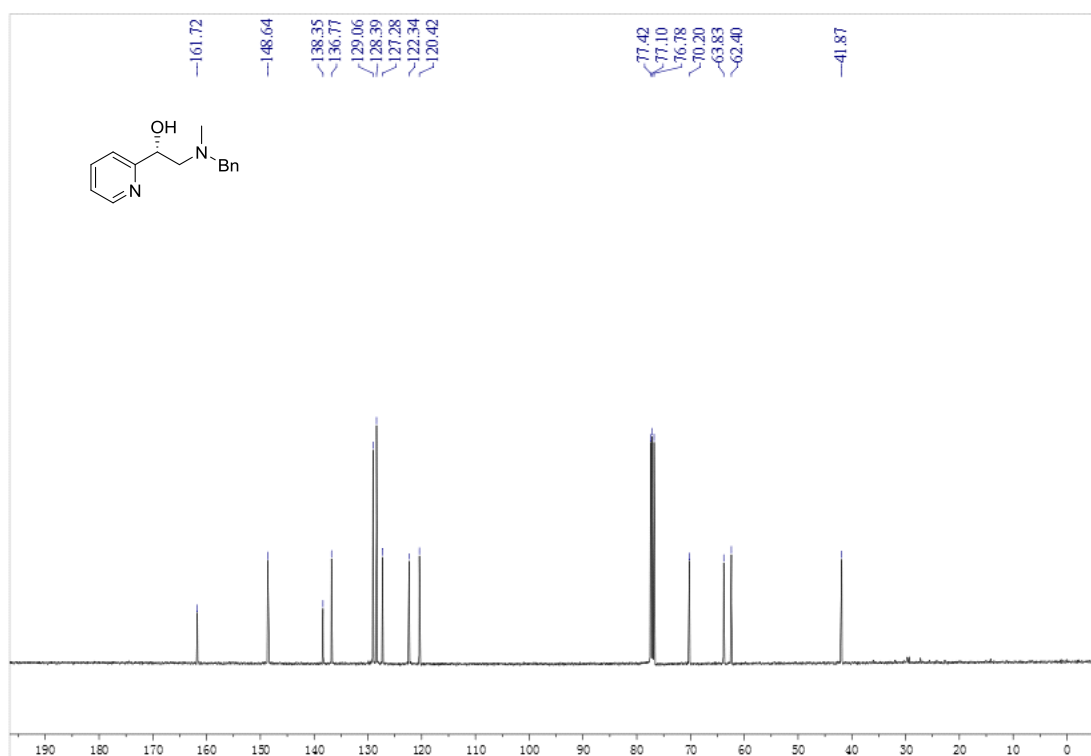

**(S)-3-(2-(benzyl(methyl)amino)-1-hydroxyethyl)phenol (2o)**

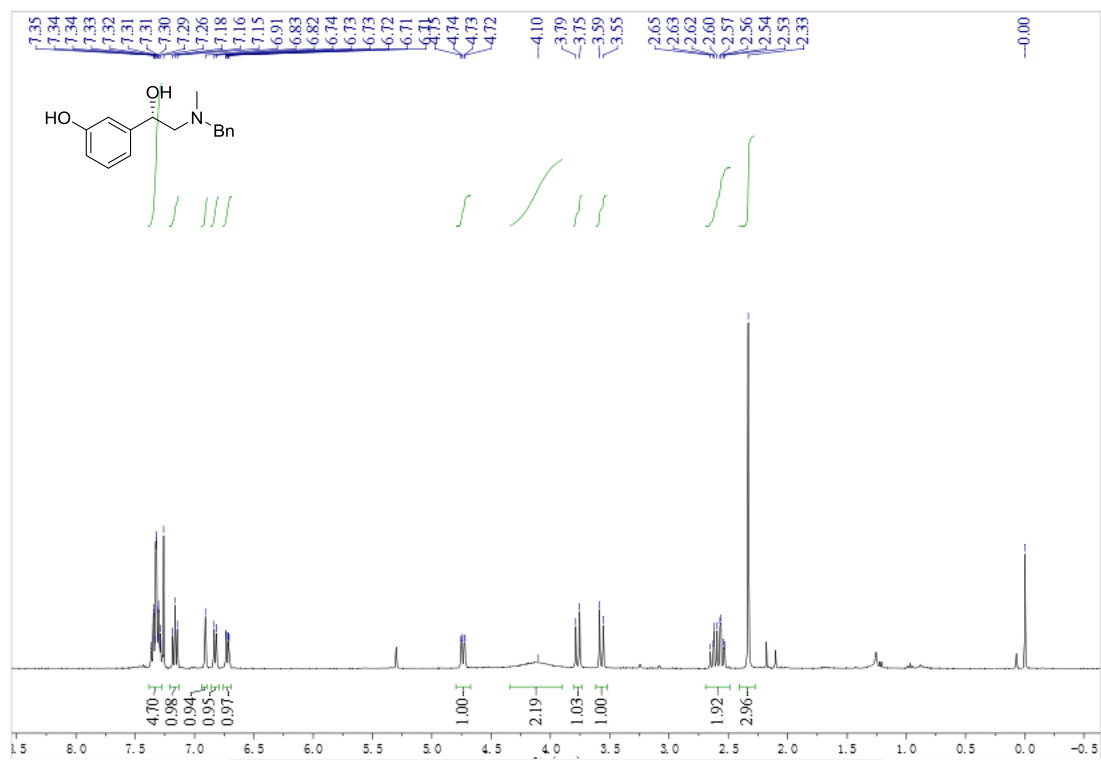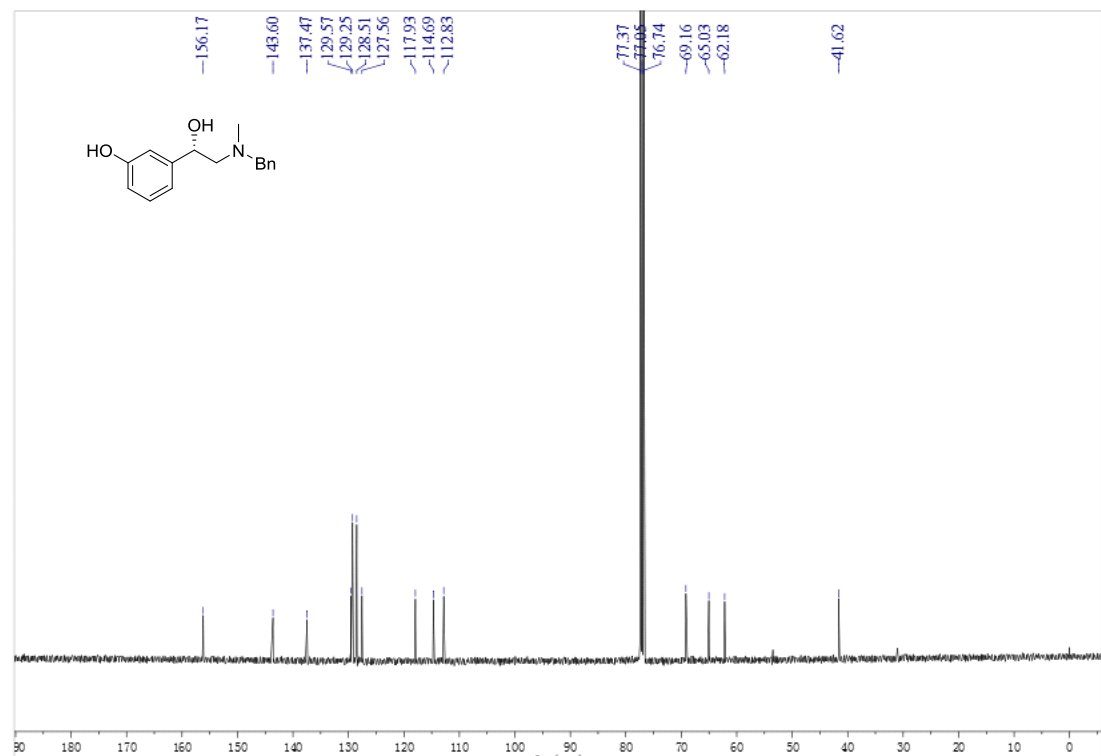



## 6. HPLC spectra

### (S)-2-(Benzyl(methyl)amino)-1-phenylethanol (2a)

Data File E:\DATA\WVL\WVL-HY-RAC\WVL-HY-RAC 2017-02-24 09-28-58\061-0201.D  
Sample Name: PH-RAC

```
=====
Acq. Operator   : SYSTEM                      Seq. Line :    2
Acq. Instrument : 1260HPLC-DAD                Location  : Vial 61
Injection Date  : 2/24/2017 9:42:04 AM       Inj       :    1
                                           Inj Volume: 2.000 µl
Acq. Method     : E:\DATA\WVL\WVL-HY-RAC\WVL-HY-RAC 2017-02-24 09-28-58\DAD-0J(1-6)-95-5-
                  LML-2UL-ALL-30MIN.M
Last changed    : 2/24/2017 9:28:58 AM by SYSTEM
Analysis Method : E:\DATA\WVL\WVL-HY-RAC\WVL-HY-RAC 2017-02-24 09-28-58\DAD-0J(1-6)-95-5-
                  LML-2UL-ALL-30MIN.M (Sequence Method)
Last changed    : 2/24/2017 4:36:06 PM by SYSTEM
                  (modified after loading)
Additional Info : Peak(s) manually integrated
=====
```

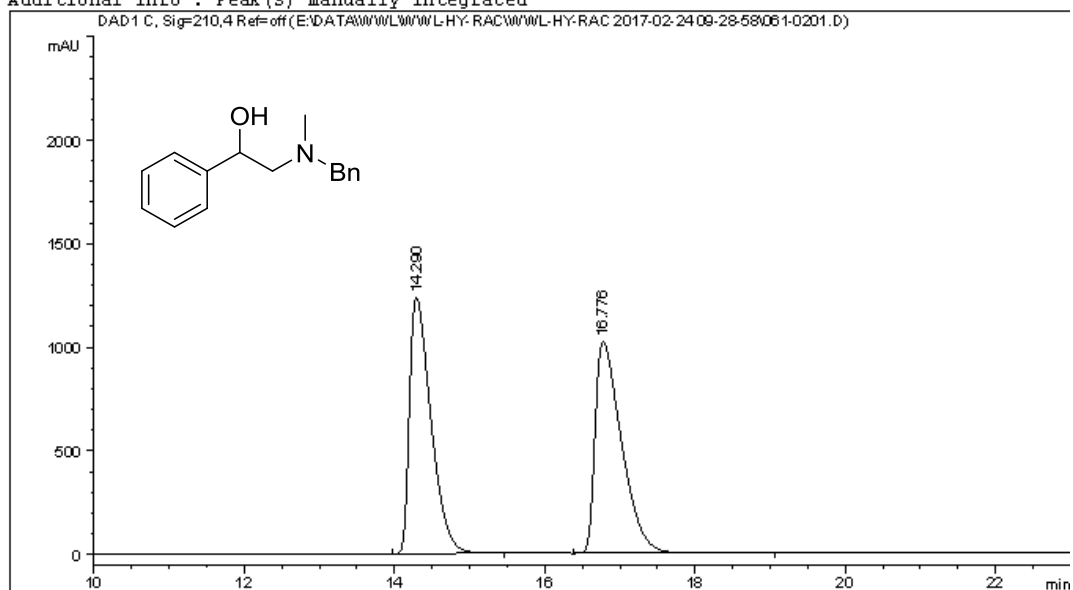

#### Area Percent Report

```
Sorted By      :      Signal
Multiplier     :      1.0000
Dilution       :      1.0000
Do not use Multiplier & Dilution Factor with ISTDs
```

Signal 1: DAD1 C, Sig=210,4 Ref=off

| Peak # | RetTime [min] | Type | Width [min] | Area [mAU*s] | Height [mAU] | Area %  |
|--------|---------------|------|-------------|--------------|--------------|---------|
| 1      | 14.290        | BB   | 0.3052      | 2.45106e4    | 1236.98792   | 49.5107 |
| 2      | 16.776        | BB   | 0.3688      | 2.49950e4    | 1024.02173   | 50.4893 |

Totals :                    4.95056e4  2261.00964

\*\*\* End of Report \*\*\*

Data File E:\DATA\WVL\WVL-HY-RAC\WVL-HY-RAC 2017-02-24 09-28-58\041-0701.D  
 Sample Name: PH-EE

```

=====
Acq. Operator   : SYSTEM                      Seq. Line :    7
Acq. Instrument : 1260HPLC-DAD                Location  : Vial 41
Injection Date  : 2/24/2017 12:16:38 PM      Inj       :    1
                                           Inj Volume: 2.000 µl

Acq. Method     : E:\DATA\WVL\WVL-HY-RAC\WVL-HY-RAC 2017-02-24 09-28-58\DAD-0J(1-6)-95-5-
                  1ML-2UL-ALL-30MIN.M
Last changed    : 2/24/2017 9:28:58 AM by SYSTEM
Analysis Method : E:\DATA\WVL\WVL-HY-RAC\WVL-HY-RAC 2017-02-24 09-28-58\DAD-0J(1-6)-95-5-
                  1ML-2UL-ALL-30MIN.M (Sequence Method)
Last changed    : 2/24/2017 4:38:07 PM by SYSTEM
                  (modified after loading)
  
```

Additional Info : Peak(s) manually integrated

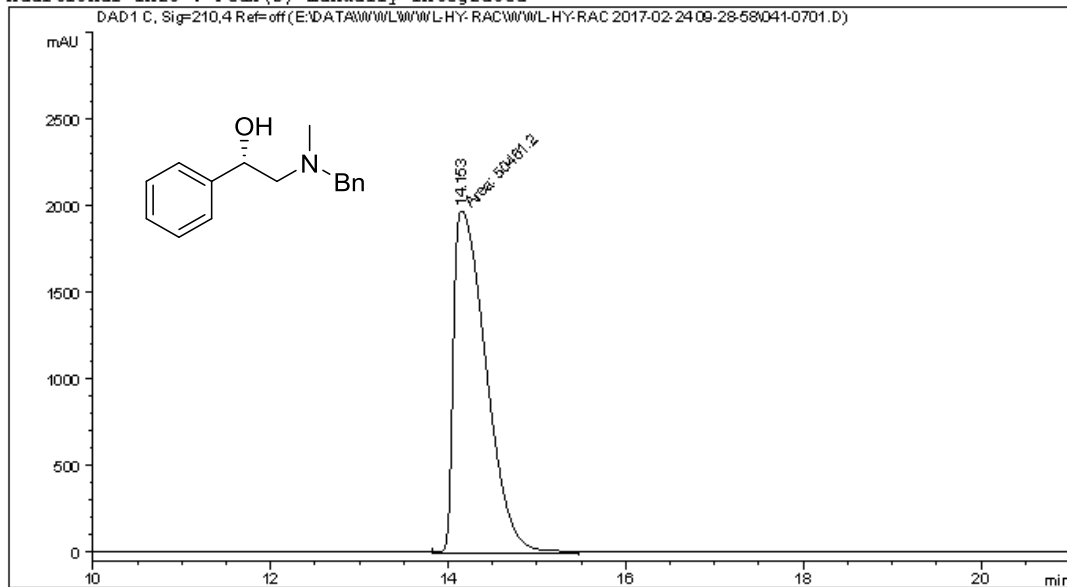

=====  
 Area Percent Report  
 =====

```

Sorted By      : Signal
Multiplier     : 1.0000
Dilution       : 1.0000
Do not use Multiplier & Dilution Factor with ISTDs
  
```

Signal 1: DAD1 C, Sig=210,4 Ref=off

| Peak # | RetTime [min] | Type | Width [min] | Area [mAU*s] | Height [mAU] | Area %   |
|--------|---------------|------|-------------|--------------|--------------|----------|
| 1      | 14.153        | MM   | 0.4254      | 5.04612e4    | 1977.12036   | 100.0000 |

Totals :                    5.04612e4  1977.12036

=====  
 \*\*\* End of Report \*\*\*

# (S)-2-(Benzyl(methyl)amino)-1-(3-methylphenyl)ethanol (2b)

Data File E:\DATA\WVL\WVL-HY-RAC\WVL-HY-RAC 2017-02-24 09-28-58\063-0401.D  
Sample Name: M-ME-RAC

```
=====
Acq. Operator   : SYSTEM                      Seq. Line :    4
Acq. Instrument : 1260HPLC-DAD                Location  : Vial 63
Injection Date  : 2/24/2017 10:43:54 AM      Inj       :    1
                                           Inj Volume: 2.000 µl
Acq. Method     : E:\DATA\WVL\WVL-HY-RAC\WVL-HY-RAC 2017-02-24 09-28-58\DAD-0J(1-6)-95-5-
                  LML-2UL-ALL-30MIN.M
Last changed    : 2/24/2017 9:28:58 AM by SYSTEM
Analysis Method : E:\DATA\WVL\WVL-HY-RAC\WVL-HY-RAC 2017-02-24 09-28-58\DAD-0J(1-6)-95-5-
                  LML-2UL-ALL-30MIN.M (Sequence Method)
Last changed    : 2/24/2017 4:22:58 PM by SYSTEM
                  (modified after loading)
Additional Info  : Peak(s) manually integrated
=====
```

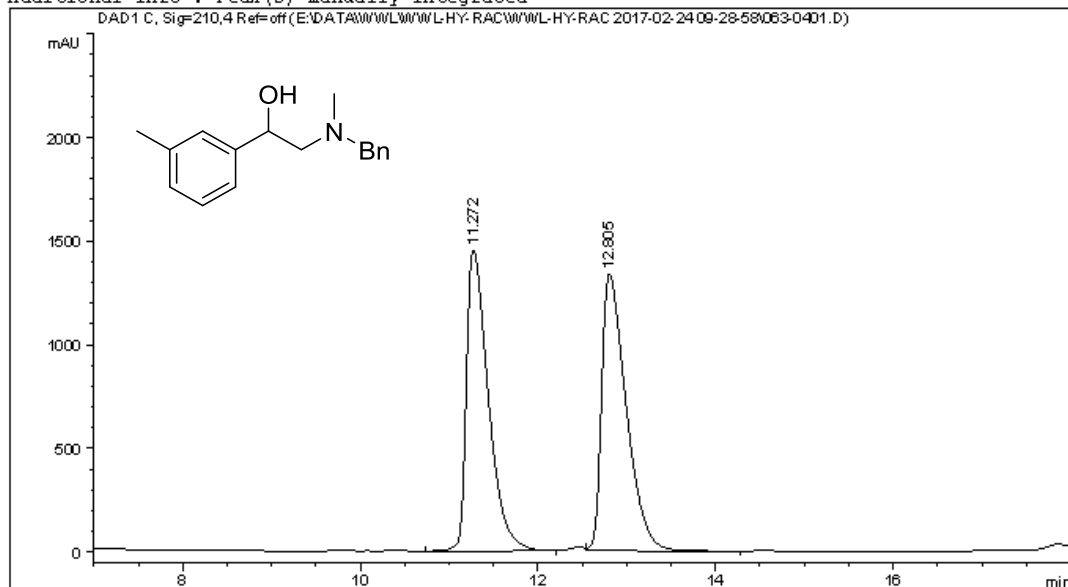

## Area Percent Report

```
Sorted By      :      Signal
Multiplier     :      1.0000
Dilution       :      1.0000
Do not use Multiplier & Dilution Factor with ISTDs
```

Signal 1: DAD1 C, Sig=210,4 Ref=off

| Peak # | RetTime [min] | Type | Width [min] | Area [mAU*s] | Height [mAU] | Area %  |
|--------|---------------|------|-------------|--------------|--------------|---------|
| 1      | 11.272        | BB   | 0.2618      | 2.48888e4    | 1453.32751   | 49.2322 |
| 2      | 12.805        | VB   | 0.2900      | 2.56651e4    | 1336.59631   | 50.7678 |

Totals : 5.05540e4 2789.92383

\*\*\* End of Report \*\*\*

Data File E:\DATA\WVL\WVL-HY-RAC\WVL-HY-RAC 2017-02-24 09-28-58\043-0901.D  
Sample Name: M-ME-EE

```
=====
Acq. Operator   : SYSTEM                      Seq. Line :    9
Acq. Instrument : 1260HPLC-DAD                Location  : Vial 43
Injection Date  : 2/24/2017 1:18:24 PM        Inj       :    1
                                           Inj Volume: 2.000 µl

Acq. Method     : E:\DATA\WVL\WVL-HY-RAC\WVL-HY-RAC 2017-02-24 09-28-58\DAD-0J(1-6)-95-5-
                  LML-2UL-ALL-30MIN.M
Last changed    : 2/24/2017 9:28:58 AM by SYSTEM
Analysis Method : E:\DATA\WVL\WVL-HY-RAC\WVL-HY-RAC 2017-02-24 09-28-58\DAD-0J(1-6)-95-5-
                  LML-2UL-ALL-30MIN.M (Sequence Method)
Last changed    : 2/24/2017 4:24:25 PM by SYSTEM
                  (modified after loading)
Additional Info : Peak(s) manually integrated
=====
```

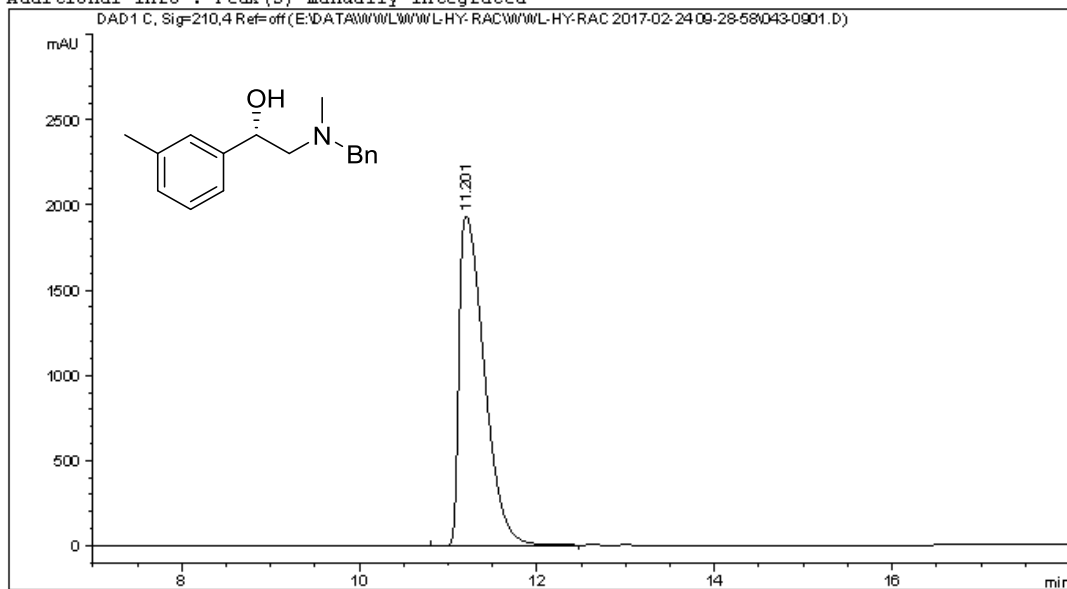

=====  
Area Percent Report  
=====

Sorted By : Signal  
Multiplier : 1.0000  
Dilution : 1.0000  
Do not use Multiplier & Dilution Factor with ISTDs

Signal 1: DAD1 C, Sig=210,4 Ref=off

| Peak # | RetTime [min] | Type | Width [min] | Area [mAU*s] | Height [mAU] | Area %   |
|--------|---------------|------|-------------|--------------|--------------|----------|
| 1      | 11.201        | BB   | 0.3043      | 3.78525e4    | 1934.52808   | 100.0000 |

Totals : 3.78525e4 1934.52808

=====  
\*\*\* End of Report \*\*\*

# (S)-2-(Benzyl(methyl)amino)-1-(4-methylphenyl)ethanol (2c)

Data File E:\DATA\HY\HY-16-9-26\HY-16-09-26 2016-09-26 12-52-19\062-0301.D  
Sample Name: HY-598

```
=====
Acq. Operator   : SYSTEM                      Seq. Line :    3
Acq. Instrument : 1260HPLC-DAD                Location  : Vial 62
Injection Date  : 9/26/2016 1:20:05 PM        Inj       :    1
                                           Inj Volume: 1.000 µl
Acq. Method     : E:\DATA\HY\HY-16-9-26\HY-16-09-26 2016-09-26 12-52-19\DAD-0J(1-6)-85-15-
                  1.OML-ALLNM-15MIN.M
Last changed    : 9/26/2016 12:52:20 PM by SYSTEM
Analysis Method : E:\DATA\HY\HY-16-9-26\HY-16-09-26 2016-09-26 12-52-19\DAD-0J(1-6)-85-15-
                  1.OML-ALLNM-15MIN.M (Sequence Method)
Last changed    : 2/9/2017 8:40:58 PM by SYSTEM
                  (modified after loading)
Additional Info  : Peak(s) manually integrated
=====
```

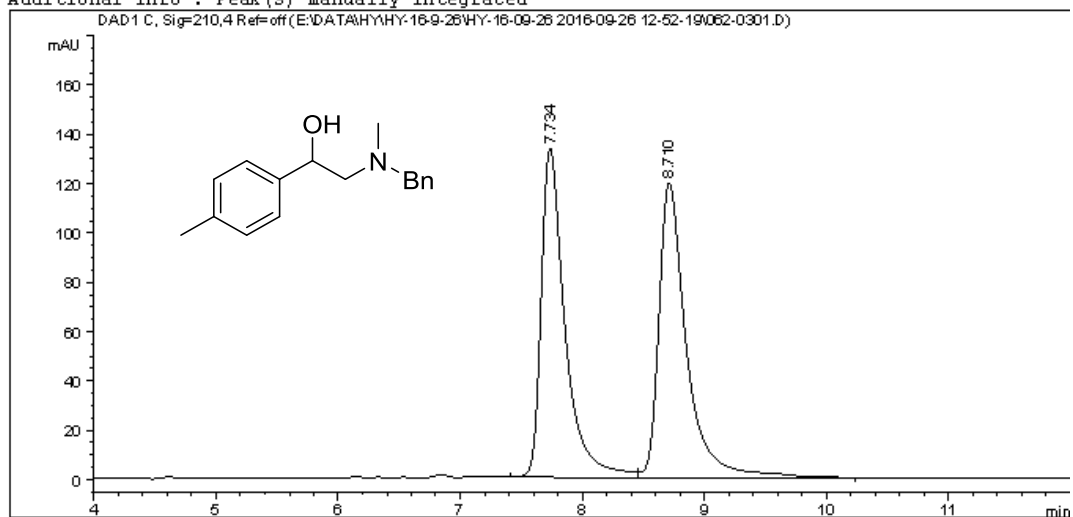

## Area Percent Report

```
Sorted By      : Signal
Multiplier     : 1.0000
Dilution       : 1.0000
Do not use Multiplier & Dilution Factor with ISTDs
```

Signal 1: DAD1 C, Sig=210,4 Ref=off

| Peak # | RetTime [min] | Type | Width [min] | Area [mAU*s] | Height [mAU] | Area %  |
|--------|---------------|------|-------------|--------------|--------------|---------|
| 1      | 7.734         | BV   | 0.2002      | 1809.70081   | 133.49043    | 49.1032 |
| 2      | 8.710         | VB   | 0.2310      | 1875.80273   | 119.59895    | 50.8968 |

Totals : 3685.50354 253.08938

\*\*\* End of Report \*\*\*

```

=====
Acq. Operator   : SYSTEM                               Seq. Line :    3
Acq. Instrument : 1260HPLC-DAD                         Location  : Vial 62
Injection Date  : 9/27/2016 4:51:23 PM                 Inj       :    1
                                                    Inj Volume: 1.000 µl

Acq. Method     : E:\DATA\HY\HY-16-09-27\HY-16-09-27 2016-09-27 16-18-34\DAD-0J(1-6)-85-15
                  -1.0ML-ALLNM-15MIN.M
Last changed    : 9/27/2016 4:18:35 PM by SYSTEM
Analysis Method : E:\DATA\HY\HY-16-09-27\HY-16-09-27 2016-09-27 16-18-34\DAD-0J(1-6)-85-15
                  -1.0ML-ALLNM-15MIN.M (Sequence Method)
Last changed    : 2/9/2017 8:43:44 PM by SYSTEM
                  (modified after loading)
Additional Info : Peak(s) manually integrated
  
```

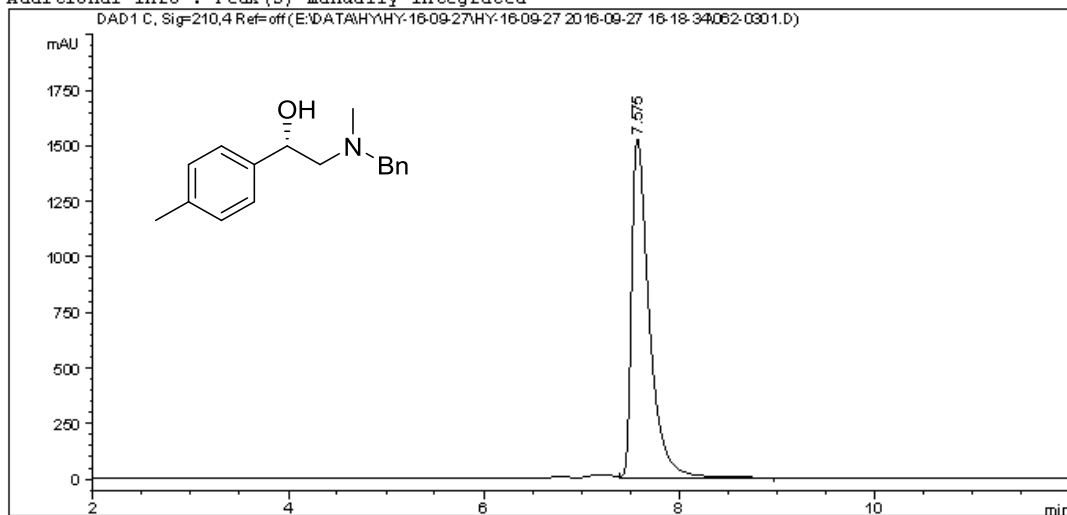

=====  
 Area Percent Report  
 =====

```

Sorted By      :      Signal
Multiplier     :      1.0000
Dilution      :      1.0000
Do not use Multiplier & Dilution Factor with ISTDs
  
```

Signal 1: DAD1 C, Sig=210,4 Ref=off

| Peak # | RetTime [min] | Type | Width [min] | Area [mAU*s] | Height [mAU] | Area %   |
|--------|---------------|------|-------------|--------------|--------------|----------|
| 1      | 7.575         | VB   | 0.1889      | 1.92436e4    | 1528.72388   | 100.0000 |

Totals :                                    1.92436e4 1528.72388

=====  
 \*\*\* End of Report \*\*\*

# (S)-2-(Benzyl(methyl)amino)-1-(2-methoxyphenyl)ethanol (2d)

Data File E:\DATA\WVL\WVL-HY-RAC\WVL-HY-RAC 2017-02-24 09-28-58\062-0301.D  
Sample Name: 0-ME0-RAC

```
=====
Acq. Operator   : SYSTEM                      Seq. Line :    3
Acq. Instrument : 1260HPLC-DAD                Location  : Vial 62
Injection Date  : 2/24/2017 10:12:59 AM      Inj       :    1
                                           Inj Volume: 2.000 µl
Acq. Method     : E:\DATA\WVL\WVL-HY-RAC\WVL-HY-RAC 2017-02-24 09-28-58\DAD-0J(1-6)-95-5-
                  LML-2UL-ALL-30MIN.M
Last changed    : 2/24/2017 9:28:58 AM by SYSTEM
Analysis Method : E:\DATA\WVL\WVL-HY-RAC\WVL-HY-RAC 2017-02-24 09-28-58\DAD-0J(1-6)-95-5-
                  LML-2UL-ALL-30MIN.M (Sequence Method)
Last changed    : 2/24/2017 4:26:10 PM by SYSTEM
                  (modified after loading)
Additional Info  : Peak(s) manually integrated
=====
```

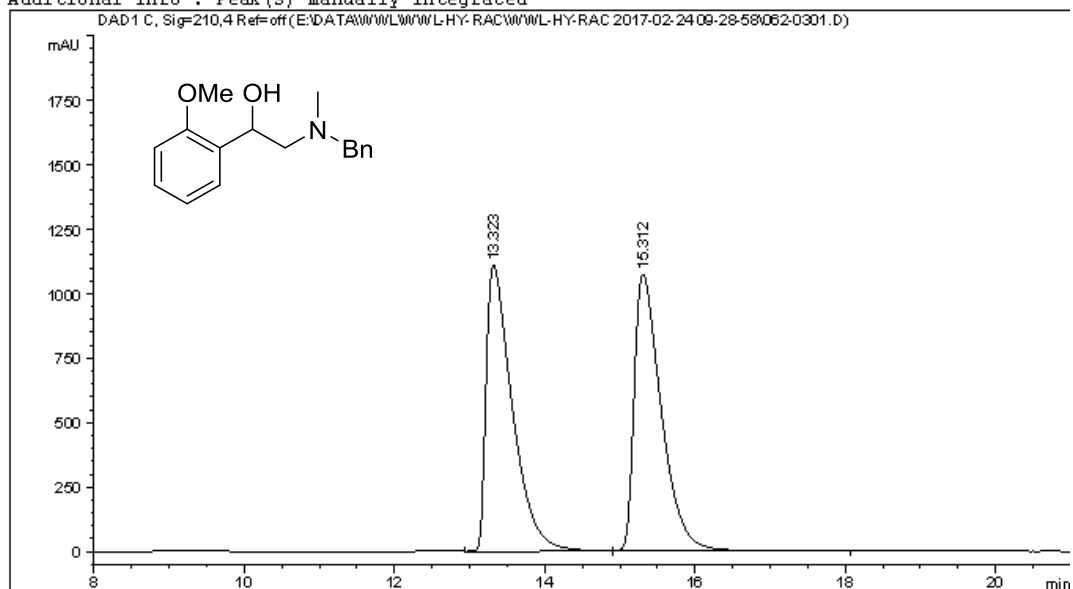

## Area Percent Report

```
Sorted By      :      Signal
Multiplier     :      1.0000
Dilution       :      1.0000
Do not use Multiplier & Dilution Factor with ISTDs
```

Signal 1: DAD1 C, Sig=210,4 Ref=off

| Peak # | RetTime [min] | Type | Width [min] | Area [mAU*s] | Height [mAU] | Area %  |
|--------|---------------|------|-------------|--------------|--------------|---------|
| 1      | 13.323        | BV   | 0.3605      | 2.68774e4    | 1109.82776   | 49.8642 |
| 2      | 15.312        | VB   | 0.3791      | 2.70238e4    | 1075.81323   | 50.1358 |

Totals : 5.39012e4 2185.64099

\*\*\* End of Report \*\*\*





# (S)-2-(Benzyl(methyl)amino)-1-(3-methoxyphenyl)ethanol (2e)

Data File E:\DATA\HY\HY-16-9-26\HY-16-09-26 2016-09-26 12-52-19\063-0401.D  
Sample Name: HY-599

```
=====
Acq. Operator   : SYSTEM                      Seq. Line :    4
Acq. Instrument : 1260HPLC-DAD                Location  : Vial 63
Injection Date  : 9/26/2016 1:35:58 PM        Inj       :    1
                                           Inj Volume: 1.000 µl
Acq. Method     : E:\DATA\HY\HY-16-9-26\HY-16-09-26 2016-09-26 12-52-19\DAD-0J(1-6)-85-15-
                  1.OML-ALLNM-15MIN.M
Last changed    : 9/26/2016 12:52:20 PM by SYSTEM
Analysis Method : E:\DATA\HY\HY-16-9-26\HY-16-09-26 2016-09-26 12-52-19\DAD-0J(1-6)-85-15-
                  1.OML-ALLNM-15MIN.M (Sequence Method)
Last changed    : 2/9/2017 8:47:00 PM by SYSTEM
                  (modified after loading)
Additional Info  : Peak(s) manually integrated
=====
```

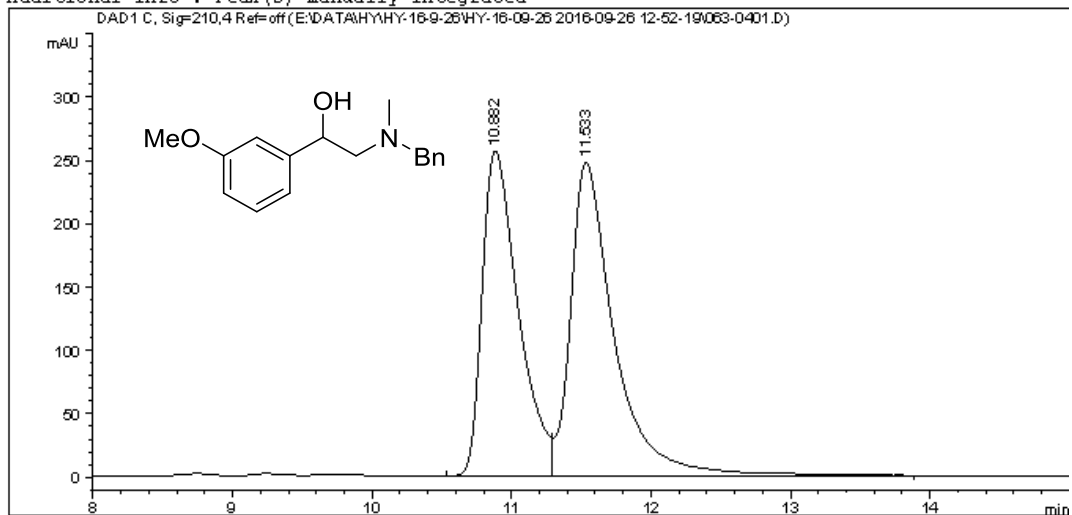

## Area Percent Report

```
Sorted By      :      Signal
Multiplier     :      1.0000
Dilution      :      1.0000
Do not use Multiplier & Dilution Factor with ISTDs
```

Signal 1: DAD1 C, Sig=210,4 Ref=off

| Peak # | RetTime [min] | Type | Width [min] | Area [mAU*s] | Height [mAU] | Area %  |
|--------|---------------|------|-------------|--------------|--------------|---------|
| 1      | 10.882        | BV   | 0.2700      | 4619.91064   | 256.70032    | 46.2962 |
| 2      | 11.533        | VB   | 0.3163      | 5359.11670   | 247.79356    | 53.7038 |

Totals : 9979.02734 504.49388

\*\*\* End of Report \*\*\*

```

=====
Acq. Operator   : SYSTEM                               Seq. Line :    4
Acq. Instrument : 1260HPLC-DAD                         Location  : Vial 63
Injection Date  : 9/27/2016 5:07:19 PM                Inj       :    1
                                                    Inj Volume: 1.000 µl
Acq. Method     : E:\DATA\HY\HY-16-09-27\HY-16-09-27 2016-09-27 16-18-34\DAD-0J(1-6)-85-15
                  -1.0ML-ALLNM-15MIN.M
Last changed    : 9/27/2016 4:18:35 PM by SYSTEM
Analysis Method : E:\DATA\HY\HY-16-09-27\HY-16-09-27 2016-09-27 16-18-34\DAD-0J(1-6)-85-15
                  -1.0ML-ALLNM-15MIN.M (Sequence Method)
Last changed    : 2/9/2017 8:50:50 PM by SYSTEM
                  (modified after loading)
Additional Info  : Peak(s) manually integrated
  
```

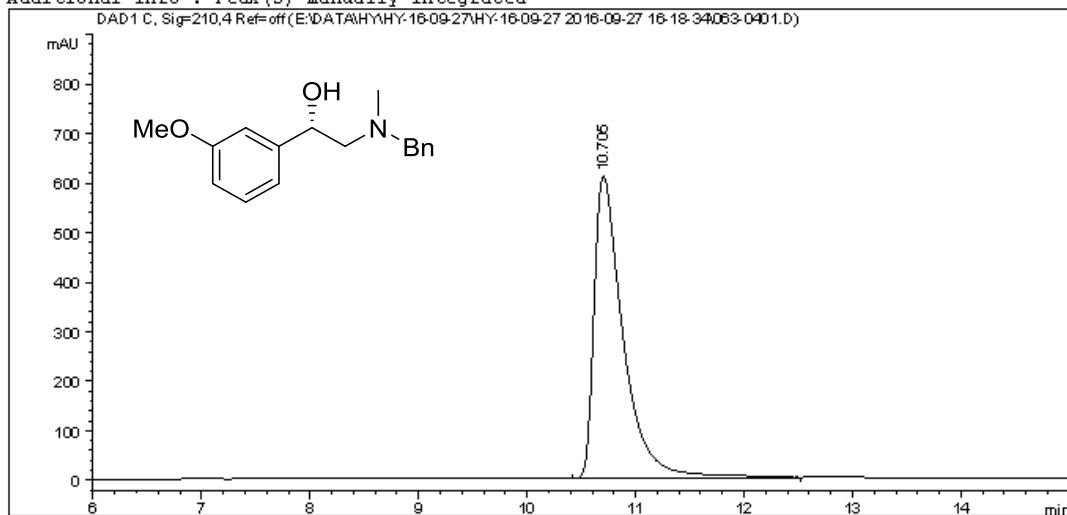

=====  
 Area Percent Report  
 =====

```

Sorted By      :      Signal
Multiplier     :      1.0000
Dilution      :      1.0000
Do not use Multiplier & Dilution Factor with ISTDs
  
```

Signal 1: DAD1 C, Sig=210,4 Ref=off

| Peak # | RetTime [min] | Type | Width [min] | Area [mAU*s] | Height [mAU] | Area %   |
|--------|---------------|------|-------------|--------------|--------------|----------|
| 1      | 10.705        | BB   | 0.2754      | 1.13701e4    | 610.29456    | 100.0000 |

Totals :                                    1.13701e4    610.29456

=====  
 \*\*\* End of Report \*\*\*

# (S)-2-(Benzyl(methyl)amino)-1-(4-methoxyphenyl)ethanol (2f)

Data File E:\DATA\HY\HY-16-09-27\HY-16-09-27 2016-09-27 16-18-34\069-1001.D  
Sample Name: HY-16-09-27-600-RAC

```
=====
Acq. Operator   : SYSTEM                      Seq. Line :   10
Acq. Instrument : 1260HPLC-DAD                Location  : Vial 69
Injection Date  : 9/27/2016 6:42:45 PM        Inj       :    1
                                           Inj Volume: 1.000 µl
Acq. Method     : E:\DATA\HY\HY-16-09-27\HY-16-09-27 2016-09-27 16-18-34\
DAD-OJ (1-6)-85-15
-1.0ML-ALLNM-15MIN.M
Last changed    : 9/27/2016 7:06:17 PM by SYSTEM
(modified after loading)
Analysis Method : E:\DATA\HY\HY-16-09-27\HY-16-09-27 2016-09-27 16-18-34\
DAD-OJ (1-6)-85-15
-1.0ML-ALLNM-15MIN.M (Sequence Method)
Last changed    : 2/9/2017 8:31:33 PM by SYSTEM
(modified after loading)
Additional Info : Peak(s) manually integrated
=====
```

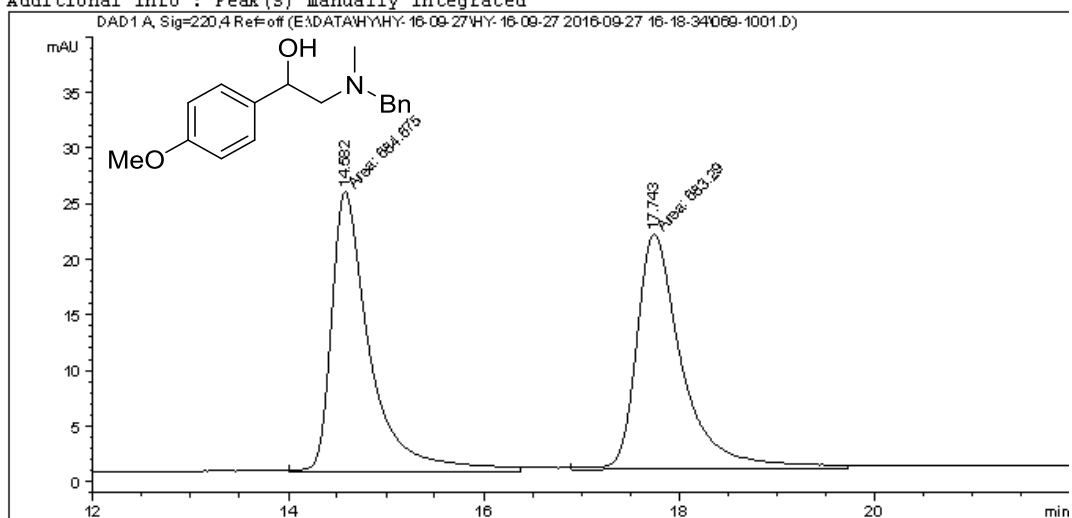

## Area Percent Report

```
Sorted By      : Signal
Multiplier     : 1.0000
Dilution       : 1.0000
Do not use Multiplier & Dilution Factor with ISTDs
```

Signal 1: DAD1 A, Sig=220,4 Ref=off

| Peak # | RetTime [min] | Type | Width [min] | Area [mAU*s] | Height [mAU] | Area %  |
|--------|---------------|------|-------------|--------------|--------------|---------|
| 1      | 14.582        | MM   | 0.4541      | 684.67493    | 25.13113     | 50.0506 |
| 2      | 17.743        | MM   | 0.5397      | 683.29016    | 21.10250     | 49.9494 |

Totals : 1367.96509 46.23363

\*\*\* End of Report \*\*\*

```

=====
Acq. Operator   : SYSTEM                               Seq. Line :    2
Acq. Instrument : 1260HPLC-DAD                         Location  : Vial 64
Injection Date  : 9/27/2016 7:20:03 PM                Inj       :    1
                                                    Inj Volume: 1.000 µl

Acq. Method     : E:\DATA\HY\HY-16-09-27-1\HY-16-09-27-1 2016-09-27 19-08-09\DAD-0J(1-6)-
                  85-15-1.OML-ALLNM-15MIN.M
Last changed    : 9/27/2016 7:27:50 PM by SYSTEM
                  (modified after loading)
Analysis Method : E:\DATA\HY\HY-16-09-27-1\HY-16-09-27-1 2016-09-27 19-08-09\DAD-0J(1-6)-
                  85-15-1.OML-ALLNM-15MIN.M (Sequence Method)
Last changed    : 2/9/2017 8:37:13 PM by SYSTEM
                  (modified after loading)
  
```

Additional Info : Peak(s) manually integrated

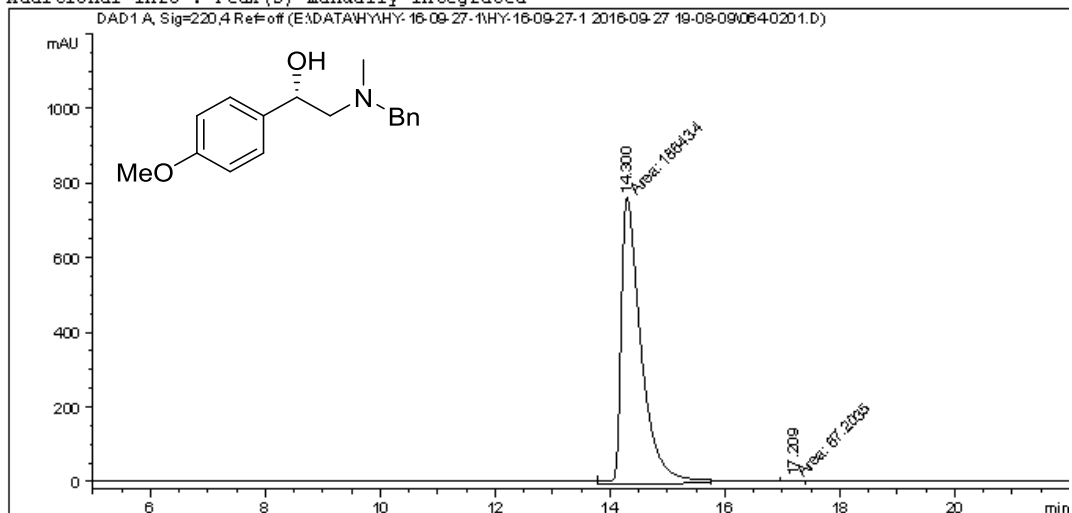

=====  
 Area Percent Report  
 =====

```

Sorted By      :      Signal
Multiplier     :      1.0000
Dilution       :      1.0000
Do not use Multiplier & Dilution Factor with ISTDs
  
```

Signal 1: DAD1 A, Sig=220,4 Ref=off

| Peak # | RetTime [min] | Type | Width [min] | Area [mAU*s] | Height [mAU] | Area %  |
|--------|---------------|------|-------------|--------------|--------------|---------|
| 1      | 14.300        | MM   | 0.4055      | 1.86434e4    | 766.19769    | 99.6408 |
| 2      | 17.209        | MM   | 0.3921      | 67.20346     | 2.85659      | 0.3592  |

Totals :                    1.87106e4   769.05429

=====  
 \*\*\* End of Report \*\*\*



Data File E:\DATA\WVL\WVL-HY-RAC\WVL-HY-RAC 2017-02-24 09-28-58\046-1301.D  
Sample Name: M-F-EE

```
=====
Acq. Operator   : SYSTEM                               Seq. Line :   13
Acq. Instrument : 1260HPLC-DAD                         Location  : Vial 46
Injection Date  : 2/24/2017 3:02:15 PM                 Inj       :    1
                                                    Inj Volume: 2.000 µl

Acq. Method     : E:\DATA\WVL\WVL-HY-RAC\WVL-HY-RAC 2017-02-24 09-28-58\DAD-0J(1-6)-97-3-
                  LML-2UL-ALL-30MIN.M
Last changed    : 2/24/2017 9:45:54 AM by SYSTEM
Analysis Method : E:\DATA\WVL\WVL-HY-RAC\WVL-HY-RAC 2017-02-24 09-28-58\DAD-0J(1-6)-97-3-
                  LML-2UL-ALL-30MIN.M (Sequence Method)
Last changed    : 2/24/2017 4:18:55 PM by SYSTEM
                  (modified after loading)
Additional Info : Peak(s) manually integrated
=====
```

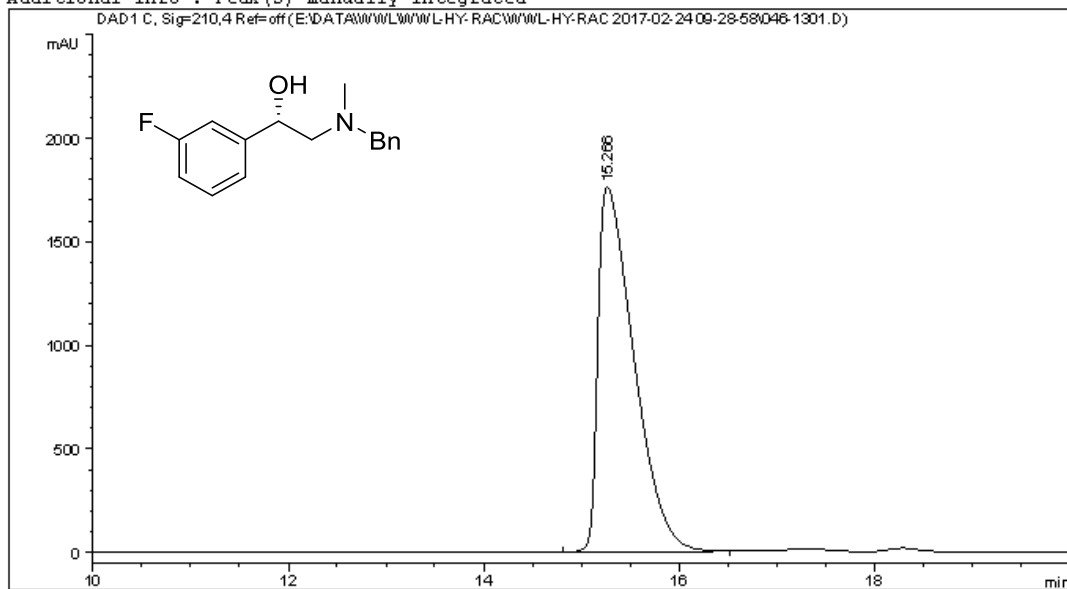

=====  
Area Percent Report  
=====

Sorted By : Signal  
Multiplier : 1.0000  
Dilution : 1.0000  
Do not use Multiplier & Dilution Factor with ISTDs

Signal 1: DAD1 C, Sig=210,4 Ref=off

| Peak # | RetTime [min] | Type | Width [min] | Area [mAU*s] | Height [mAU] | Area %   |
|--------|---------------|------|-------------|--------------|--------------|----------|
| 1      | 15.266        | BB   | 0.3920      | 4.50202e4    | 1762.76770   | 100.0000 |

Totals : 4.50202e4 1762.76770

=====  
\*\*\* End of Report \*\*\*

# (S)-2-(Benzyl(methyl)amino)-1-(2-chlorophenyl)ethanol (2h)

Data File E:\DATA\YHL\YHL-6-50\YHL-6-50-1 2017-02-22 20-54-57\051-1401.D  
Sample Name: HY-0-CL-RAC

```
=====
Acq. Operator   : SYSTEM                      Seq. Line :   14
Acq. Instrument : 1260HPLC-VWD                Location  : Vial 51
Injection Date  : 2/23/2017 6:30:51 AM       Inj       :    1
                                           Inj Volume: 1.000 µl
Acq. Method     : E:\DATA\YHL\YHL-6-50\YHL-6-50-1 2017-02-22 20-54-57\VWD-AD (1-2)-98-2-1UL
                                           -0.3ML-210NM-60MIN.M
Last changed    : 2/22/2017 9:42:42 PM by SYSTEM
Analysis Method : E:\DATA\YHL\YHL-6-50\YHL-6-50-1 2017-02-22 20-54-57\VWD-AD (1-2)-98-2-1UL
                                           -0.3ML-210NM-60MIN.M (Sequence Method)
Last changed    : 2/23/2017 8:13:44 PM by SYSTEM
                                           (modified after loading)
Additional Info  : Peak(s) manually integrated
=====
```

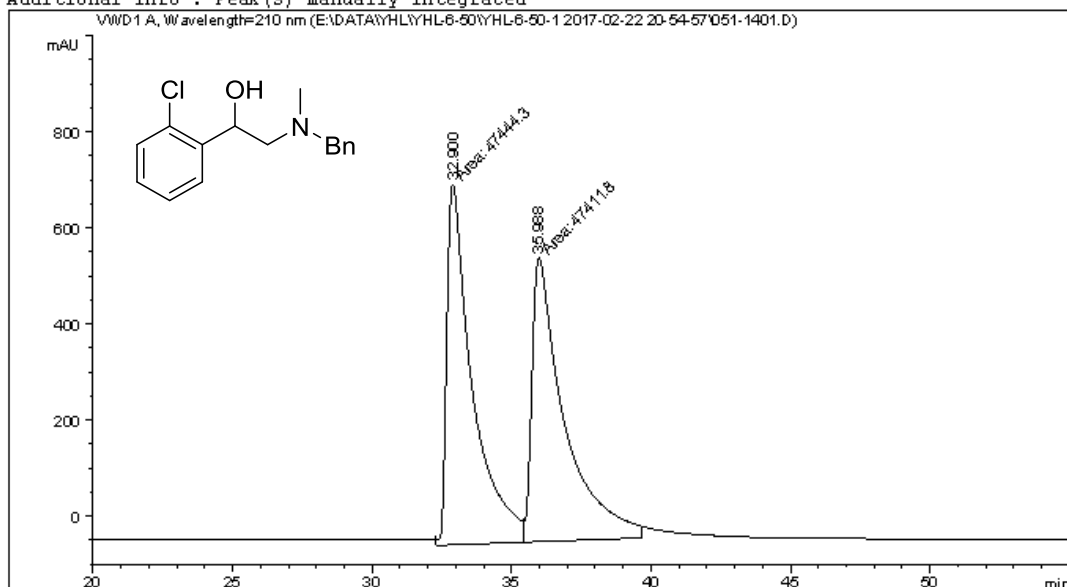

## Area Percent Report

```
Sorted By      :      Signal
Multiplier     :      1.0000
Dilution       :      1.0000
Do not use Multiplier & Dilution Factor with ISTDs
```

Signal 1: VWD1 A, Wavelength=210 nm

| Peak # | RetTime [min] | Type | Width [min] | Area [mAU*s] | Height [mAU] | Area %  |
|--------|---------------|------|-------------|--------------|--------------|---------|
| 1      | 32.900        | MF   | 1.0537      | 4.74443e4    | 750.42676    | 50.0171 |
| 2      | 35.988        | FM   | 1.3393      | 4.74118e4    | 589.99445    | 49.9829 |

Totals : 9.48562e4 1340.42120

\*\*\* End of Report \*\*\*





# (S)-2-(Benzyl(methyl)amino)-1-(4-chlorophenyl)ethanol (2i)

Data File E:\DATA\HY\HY-16-9-26\HY-16-09-26 2016-09-26 12-52-19\068-0901.D  
Sample Name: HY-604

```
=====
Acq. Operator   : SYSTEM                      Seq. Line :    9
Acq. Instrument : 1260HPLC-DAD                Location  : Vial 68
Injection Date  : 9/26/2016 2:55:30 PM        Inj       :    1
                                           Inj Volume: 1.000 µl
Acq. Method     : E:\DATA\HY\HY-16-9-26\HY-16-09-26 2016-09-26 12-52-19\DAD-0J(1-6)-85-15-
                                           1.OML-ALLNM-15MIN.M
Last changed    : 9/26/2016 12:52:20 PM by SYSTEM
Analysis Method : E:\DATA\HY\HY-16-9-26\HY-16-09-26 2016-09-26 12-52-19\DAD-0J(1-6)-85-15-
                                           1.OML-ALLNM-15MIN.M (Sequence Method)
Last changed    : 2/9/2017 9:04:21 PM by SYSTEM
                                           (modified after loading)
Additional Info  : Peak(s) manually integrated
=====
```

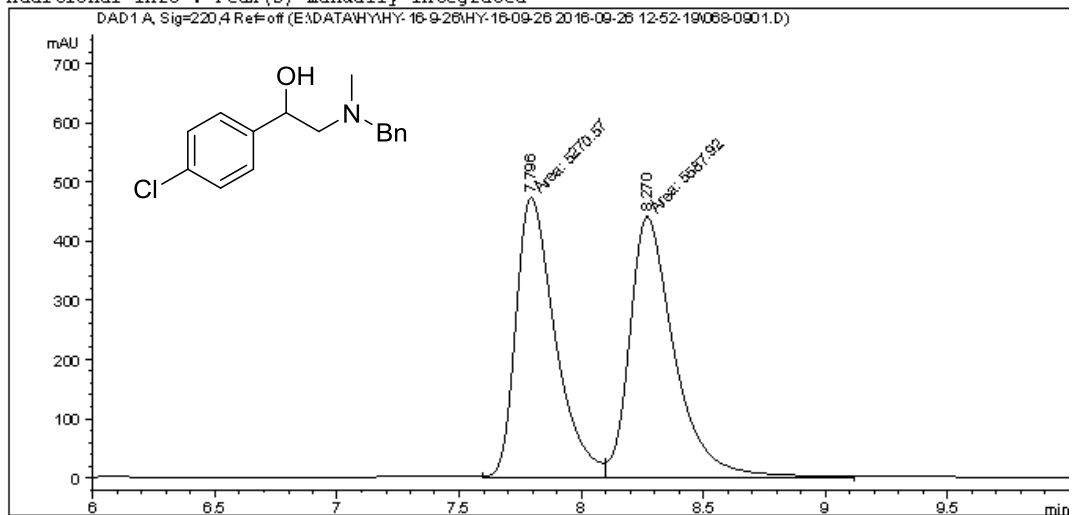

## Area Percent Report

```
Sorted By      :      Signal
Multiplier     :      1.0000
Dilution       :      1.0000
Do not use Multiplier & Dilution Factor with ISTDs
```

Signal 1: DAD1 A, Sig=220,4 Ref=off

| Peak # | RetTime [min] | Type | Width [min] | Area [mAU*s] | Height [mAU] | Area %  |
|--------|---------------|------|-------------|--------------|--------------|---------|
| 1      | 7.96          | MF   | 0.1856      | 5270.57324   | 473.17984    | 48.5387 |
| 2      | 8.270         | FM   | 0.2114      | 5587.92285   | 440.55948    | 51.4613 |

Totals : 1.08585e4 913.73932

\*\*\* End of Report \*\*\*

Data File E:\DATA\HY\HY-16-09-27\HY-16-09-27 2016-09-27 16-18-34\068-0901.D  
Sample Name: HY-16-09-27-604

```
=====
Acq. Operator   : SYSTEM                               Seq. Line :    9
Acq. Instrument : 1260HPLC-DAD                         Location  : Vial 68
Injection Date  : 9/27/2016 6:26:51 PM                 Inj       :    1
                                                    Inj Volume: 1.000 µl
Acq. Method     : E:\DATA\HY\HY-16-09-27\HY-16-09-27 2016-09-27 16-18-34\DAD-OJ(1-6)-85-15
                  -1.0ML-ALLNM-15MIN.M
Last changed    : 9/27/2016 4:18:35 PM by SYSTEM
Analysis Method : E:\DATA\HY\HY-16-09-27\HY-16-09-27 2016-09-27 16-18-34\DAD-OJ(1-6)-85-15
                  -1.0ML-ALLNM-15MIN.M (Sequence Method)
Last changed    : 2/9/2017 9:15:51 PM by SYSTEM
                  (modified after loading)
Additional Info : Peak(s) manually integrated
=====
```

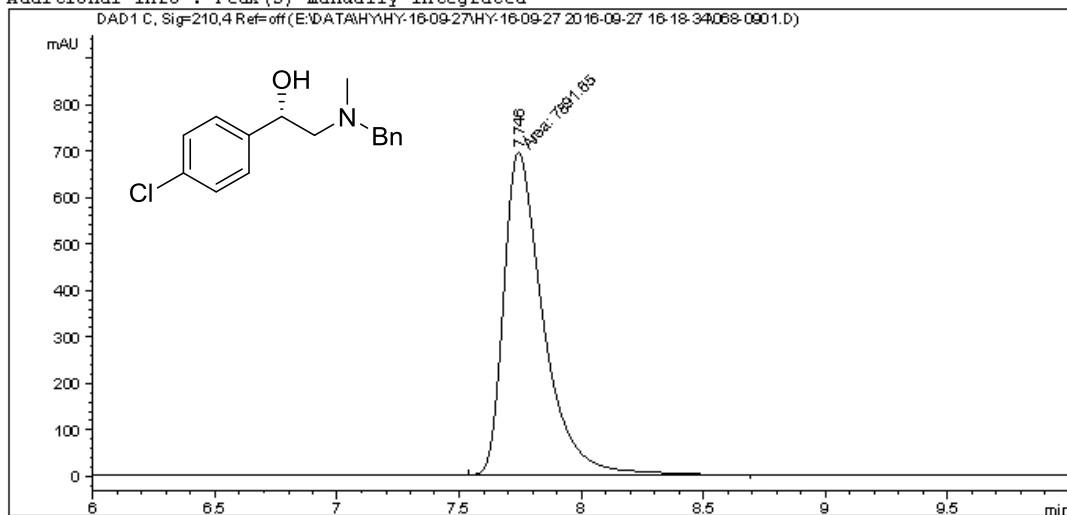

=====  
Area Percent Report  
=====

Sorted By : Signal  
Multiplier : 1.0000  
Dilution : 1.0000  
Do not use Multiplier & Dilution Factor with ISTDs

Signal 1: DAD1 C, Sig=210,4 Ref=off

| Peak # | RetTime [min] | Type | Width [min] | Area [mAU*s] | Height [mAU] | Area %   |
|--------|---------------|------|-------------|--------------|--------------|----------|
| 1      | 7.746         | MM   | 0.1894      | 7891.65234   | 694.37036    | 100.0000 |

Totals : 7891.65234 694.37036

=====  
\*\*\* End of Report \*\*\*

# (S)-2-(Benzyl(methyl)amino)-1-(3-bromophenyl)ethanol (2j)

Data File E:\DATA\YC\YC-5-25\YC-5-25 2017-03-03 14-40-28\051-2401.D  
Sample Name: HY-M-BR-RAC

```
=====
Acq. Operator   : SYSTEM                      Seq. Line :   24
Acq. Instrument : 1260HPLC-DAD                Location  : Vial 51
Injection Date  : 3/4/2017 5:21:00 AM        Inj       :    1
                                           Inj Volume: 2.000 µl
Acq. Method     : E:\DATA\YC\YC-5-25\YC-5-25 2017-03-03 14-40-28\DAD-0J(1-6)-97-3-1ML-2UL-
                  ALL-45MIN.M
Last changed    : 3/3/2017 8:47:17 PM by SYSTEM
Analysis Method : E:\DATA\YC\YC-5-25\YC-5-25 2017-03-03 14-40-28\DAD-0J(1-6)-97-3-1ML-2UL-
                  ALL-45MIN.M (Sequence Method)
Last changed    : 3/11/2017 9:40:01 AM by SYSTEM
                  (modified after loading)
Additional Info : Peak(s) manually integrated
=====
```

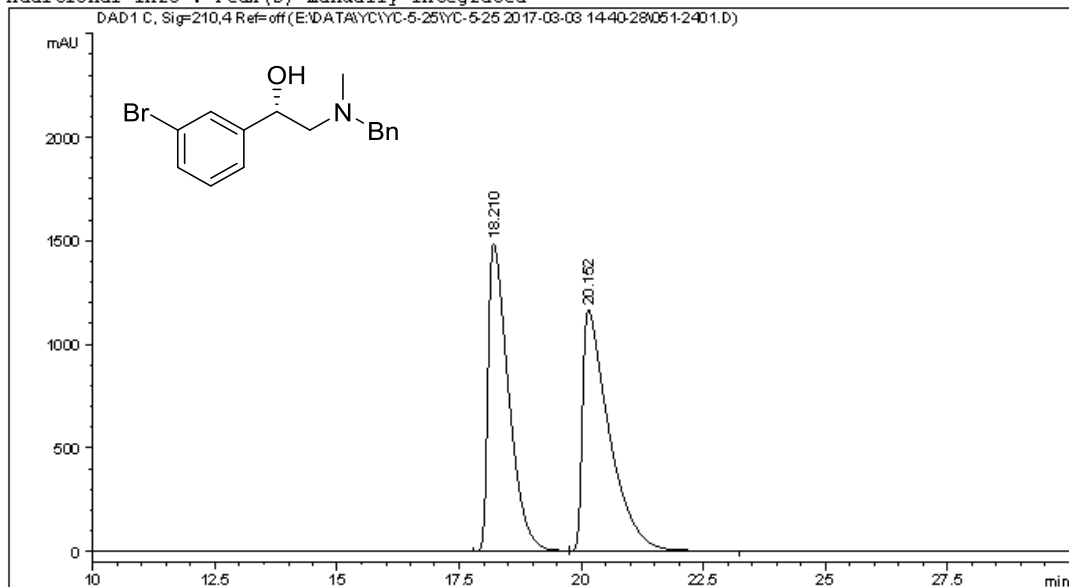

## Area Percent Report

```
Sorted By      :      Signal
Multiplier     :      1.0000
Dilution       :      1.0000
Do not use Multiplier & Dilution Factor with ISTDs
```

Signal 1: DAD1 C, Sig=210,4 Ref=off

| Peak # | RetTime [min] | Type | Width [min] | Area [mAU*s] | Height [mAU] | Area %  |
|--------|---------------|------|-------------|--------------|--------------|---------|
| 1      | 18.210        | VV   | 0.4345      | 4.33977e4    | 1486.92542   | 49.4453 |
| 2      | 20.152        | VB   | 0.5425      | 4.43713e4    | 1164.65344   | 50.5547 |

Totals : 8.77690e4 2651.57886

\*\*\* End of Report \*\*\*

Data File E:\DATA\WVL\WVL-HY-RAC\WVL-HY-RAC 2017-03-10 21-36-42\005-0801.D  
Sample Name: WVL-HY-M-BR-EE

```
=====
Acq. Operator   : SYSTEM                      Seq. Line :    8
Acq. Instrument : 1260HPLC-DAD                Location  : Vial 5
Injection Date  : 3/11/2017 12:07:34 AM      Inj       :    1
                                                Inj Volume: 2.000 µl

Acq. Method     : E:\DATA\WVL\WVL-HY-RAC\WVL-HY-RAC 2017-03-10 21-36-42\DAD-0J(1-6)-97-3-
                  LML-2UL-ALL-45MIN.M
Last changed    : 3/10/2017 10:26:20 PM by SYSTEM
Analysis Method : E:\DATA\WVL\WVL-HY-RAC\WVL-HY-RAC 2017-03-10 21-36-42\DAD-0J(1-6)-97-3-
                  LML-2UL-ALL-45MIN.M (Sequence Method)
Last changed    : 3/11/2017 9:44:35 AM by SYSTEM
                  (modified after loading)
Additional Info : Peak(s) manually integrated
=====
```

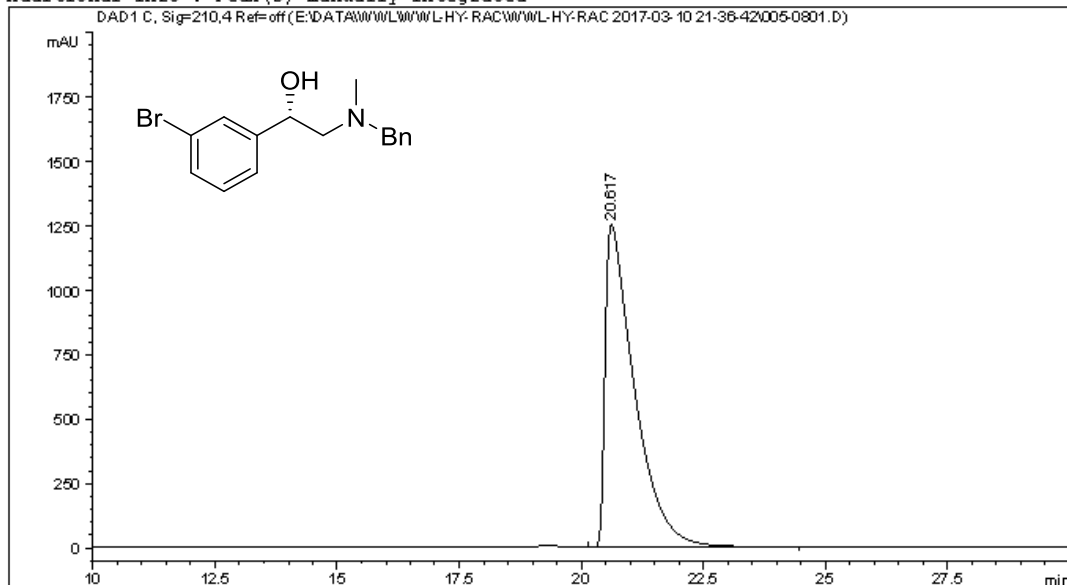

=====  
Area Percent Report  
=====

Sorted By : Signal  
Multiplier : 1.0000  
Dilution : 1.0000  
Do not use Multiplier & Dilution Factor with ISTDs

Signal 1: DAD1 C, Sig=210,4 Ref=off

| Peak # | RetTime [min] | Type | Width [min] | Area [mAU*s] | Height [mAU] | Area %   |
|--------|---------------|------|-------------|--------------|--------------|----------|
| 1      | 20.617        | BB   | 0.5934      | 5.22552e4    | 1250.82336   | 100.0000 |

Totals : 5.22552e4 1250.82336

=====  
\*\*\* End of Report \*\*\*

# (S)-2-(Benzyl(methyl)amino)-1-(4-bromophenyl)ethanol (2k)

Data File E:\DATA\WVL\WVL-HY-RAC\WVL-HY-RAC 2017-02-24 09-28-58\065-0601.D  
Sample Name: P-BR-RAC

```
=====
Acq. Operator   : SYSTEM                      Seq. Line :    6
Acq. Instrument : 1260HPLC-DAD                Location  : Vial 65
Injection Date  : 2/24/2017 11:45:43 AM      Inj       :    1
                                           Inj Volume: 2.000 µl
Acq. Method     : E:\DATA\WVL\WVL-HY-RAC\WVL-HY-RAC 2017-02-24 09-28-58\DAD-0J(1-6)-95-5-
                  LML-2UL-ALL-30MIN.M
Last changed    : 2/24/2017 9:28:58 AM by SYSTEM
Analysis Method : E:\DATA\WVL\WVL-HY-RAC\WVL-HY-RAC 2017-02-24 09-28-58\DAD-0J(1-6)-95-5-
                  LML-2UL-ALL-30MIN.M (Sequence Method)
Last changed    : 2/24/2017 4:30:39 PM by SYSTEM
                  (modified after loading)
Additional Info  : Peak(s) manually integrated
=====
```

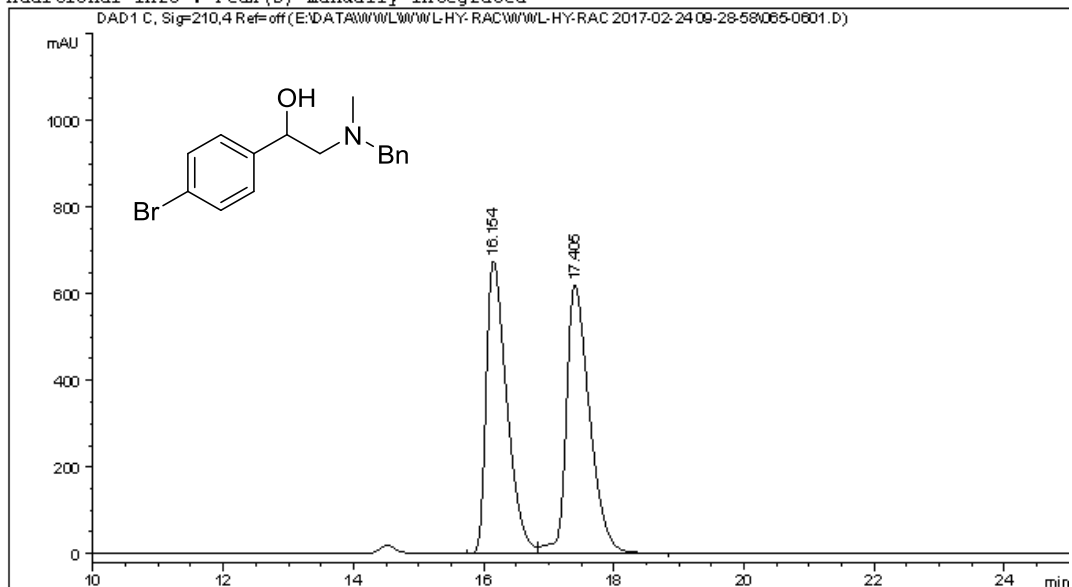

## Area Percent Report

```
Sorted By      :      Signal
Multiplier     :      1.0000
Dilution       :      1.0000
Do not use Multiplier & Dilution Factor with ISTDs
```

Signal 1: DAD1 C, Sig=210,4 Ref=off

| Peak # | RetTime [min] | Type | Width [min] | Area [mAU*s] | Height [mAU] | Area %  |
|--------|---------------|------|-------------|--------------|--------------|---------|
| 1      | 16.154        | BV   | 0.3347      | 1.48655e4    | 675.62274    | 49.1446 |
| 2      | 17.405        | VB   | 0.3757      | 1.53830e4    | 619.44073    | 50.8554 |

Totals : 3.02485e4 1295.06348

\*\*\* End of Report \*\*\*

```

=====
Acq. Operator   : SYSTEM                      Seq. Line : 11
Acq. Instrument : 1260HPLC-DAD                Location  : Vial 45
Injection Date  : 2/24/2017 2:20:14 PM        Inj       : 1
                                           Inj Volume: 2.000 µl

Acq. Method     : E:\DATA\WVL\WVL-HY-RAC\WVL-HY-RAC 2017-02-24 09-28-58\DAD-0J(1-6)-95-5-
                  1ML-2UL-ALL-30MIN.M
Last changed    : 2/24/2017 9:28:58 AM by SYSTEM
Analysis Method : E:\DATA\WVL\WVL-HY-RAC\WVL-HY-RAC 2017-02-24 09-28-58\DAD-0J(1-6)-95-5-
                  1ML-2UL-ALL-30MIN.M (Sequence Method)
Last changed    : 2/24/2017 4:33:15 PM by SYSTEM
                  (modified after loading)
Additional Info : Peak(s) manually integrated
  
```

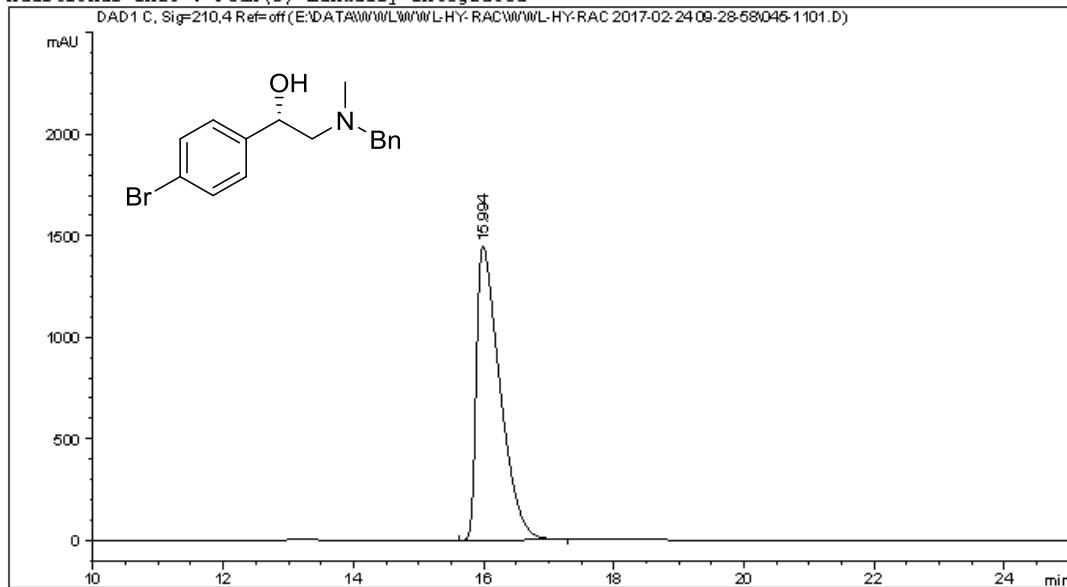

=====  
 Area Percent Report  
 =====

```

Sorted By      : Signal
Multiplier     : 1.0000
Dilution       : 1.0000
Do not use Multiplier & Dilution Factor with ISTDs
  
```

Signal 1: DAD1 C, Sig=210,4 Ref=off

| Peak # | RetTime [min] | Type | Width [min] | Area [mAU*s] | Height [mAU] | Area %   |
|--------|---------------|------|-------------|--------------|--------------|----------|
| 1      | 15.994        | BB   | 0.3777      | 3.61847e4    | 1447.10156   | 100.0000 |

Totals : 3.61847e4 1447.10156

=====  
 \*\*\* End of Report \*\*\*

### (S)-2-(tert-butylamino)-1-phenylethanol (2l)

Data File E:\DATA\WVL\WVL-HY-RAC\WVL-HY-RAC 2017-03-13 22-31-48\042-0401.D  
Sample Name: WWK-HY-TBU-RAC-1

```
=====
Acq. Operator   : SYSTEM                      Seq. Line :    4
Acq. Instrument : 1260HPLC-VWD                Location  : Vial 42
Injection Date  : 3/13/2017 11:34:54 PM      Inj       :    1
                                           Inj Volume: 1.000 µl
Acq. Method     : E:\DATA\WVL\WVL-HY-RAC\WVL-HY-RAC 2017-03-13 22-31-48\VWD-AD(1-2)-85-15-
                  LML-1UL-210NM-30MIN.M
Last changed    : 3/13/2017 10:31:49 PM by SYSTEM
Analysis Method : E:\DATA\WVL\WVL-HY-RAC\WVL-HY-RAC 2017-03-13 22-31-48\VWD-AD(1-2)-85-15-
                  LML-1UL-210NM-30MIN.M (Sequence Method)
Last changed    : 3/14/2017 4:30:47 PM by SYSTEM
                  (modified after loading)
Additional Info : Peak(s) manually integrated
=====
```

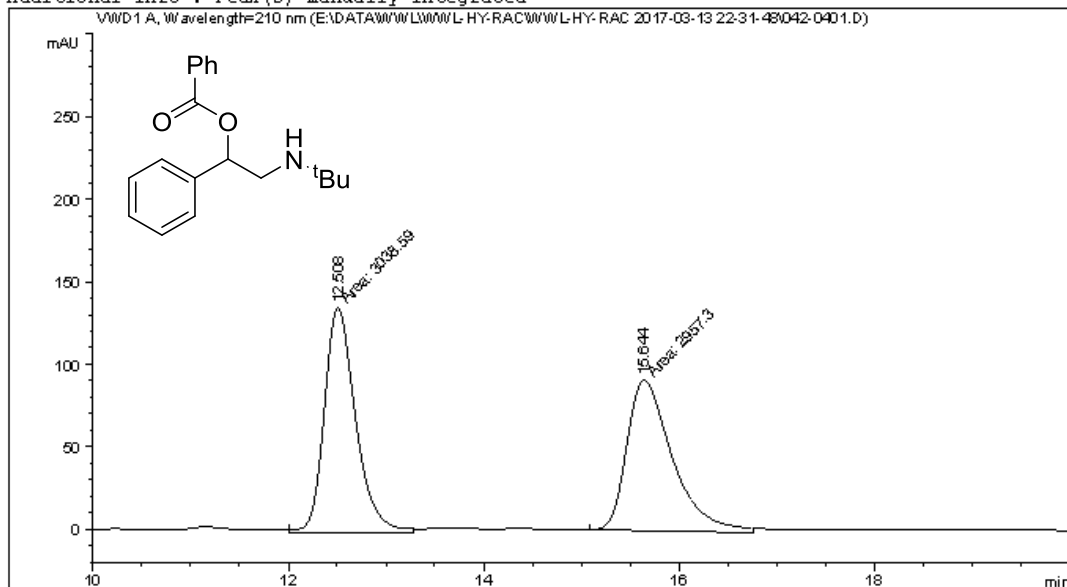

#### Area Percent Report

```
Sorted By      : Signal
Multiplier     : 1.0000
Dilution       : 1.0000
Do not use Multiplier & Dilution Factor with ISTDs
```

Signal 1: VWD1 A, Wavelength=210 nm

| Peak # | RetTime [min] | Type | Width [min] | Area [mAU*s] | Height [mAU] | Area %  |
|--------|---------------|------|-------------|--------------|--------------|---------|
| 1      | 12.508        | MM   | 0.3712      | 3038.59009   | 136.44746    | 50.6779 |
| 2      | 15.644        | MM   | 0.5403      | 2957.30371   | 91.22073     | 49.3221 |

Totals : 5995.89380 227.66819

\*\*\* End of Report \*\*\*

Data File E:\DATA\WVL\WVL-HY-RAC\WVL-HY-EE 2017-03-14 16-44-34\041-0201.D  
 Sample Name: WVL-HY-TBU-EE

```

=====
Acq. Operator   : SYSTEM                               Seq. Line :    2
Acq. Instrument : 1260HPLC-VWD                         Location  : Vial 41
Injection Date  : 3/14/2017 4:56:09 PM                Inj       :    1
                                                    Inj Volume: 5.000 µl

Acq. Method     : E:\DATA\WVL\WVL-HY-RAC\WVL-HY-EE 2017-03-14 16-44-34\WVD-ADH(1-2)-85-15-
                  1-SUL-210NM-30MIN.M
Last changed    : 3/14/2017 5:23:07 PM by SYSTEM
                  (modified after loading)
Analysis Method : E:\DATA\WVL\WVL-HY-RAC\WVL-HY-EE 2017-03-14 16-44-34\WVD-ADH(1-2)-85-15-
                  1-SUL-210NM-30MIN.M (Sequence Method)
Last changed    : 3/14/2017 5:28:57 PM by SYSTEM
                  (modified after loading)
  
```

Additional Info : Peak(s) manually integrated

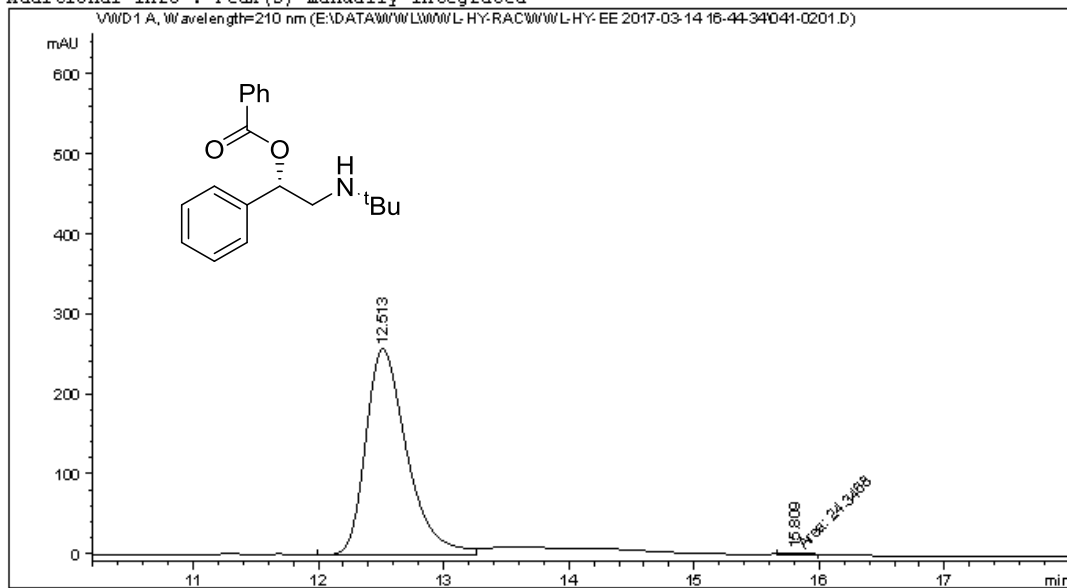

=====  
 Area Percent Report  
 =====

```

Sorted By      :      Signal
Multiplier     :      1.0000
Dilution      :      1.0000
Do not use Multiplier & Dilution Factor with ISTDs
  
```

Signal 1: WVD1 A, Wavelength=210 nm

| Peak # | RetTime [min] | Type | Width [min] | Area [mAU*s] | Height [mAU] | Area %  |
|--------|---------------|------|-------------|--------------|--------------|---------|
| 1      | 12.513        | BV   | 0.3473      | 5871.37012   | 257.20615    | 99.5870 |
| 2      | 15.809        | MM   | 0.2398      | 24.34677     | 1.69225      | 0.4130  |

Totals :                            5895.71689   258.89840





Data File E:\DATA\WVL\WVL-HY-RAC\WVL-HY-RAC 2017-03-10 21-36-42\004-0601.D  
 Sample Name: WVL-HY-SAIFEN-EE

```

=====
Acq. Operator   : SYSTEM                      Seq. Line :    6
Acq. Instrument : 1260HPLC-DAD                Location  : Vial 4
Injection Date  : 3/10/2017 11:25:36 PM      Inj       :    1
                                           Inj Volume: 2.000 µl

Acq. Method     : E:\DATA\WVL\WVL-HY-RAC\WVL-HY-RAC 2017-03-10 21-36-42\DAD-0J(1-6)-95-5-
                  LML-2UL-ALL-30MIN.M
Last changed    : 3/10/2017 10:24:42 PM by SYSTEM
Analysis Method : E:\DATA\WVL\WVL-HY-RAC\WVL-HY-RAC 2017-03-10 21-36-42\DAD-0J(1-6)-95-5-
                  LML-2UL-ALL-30MIN.M (Sequence Method)
Last changed    : 3/11/2017 9:35:39 AM by SYSTEM
                  (modified after loading)
  
```

Additional Info : Peak(s) manually integrated

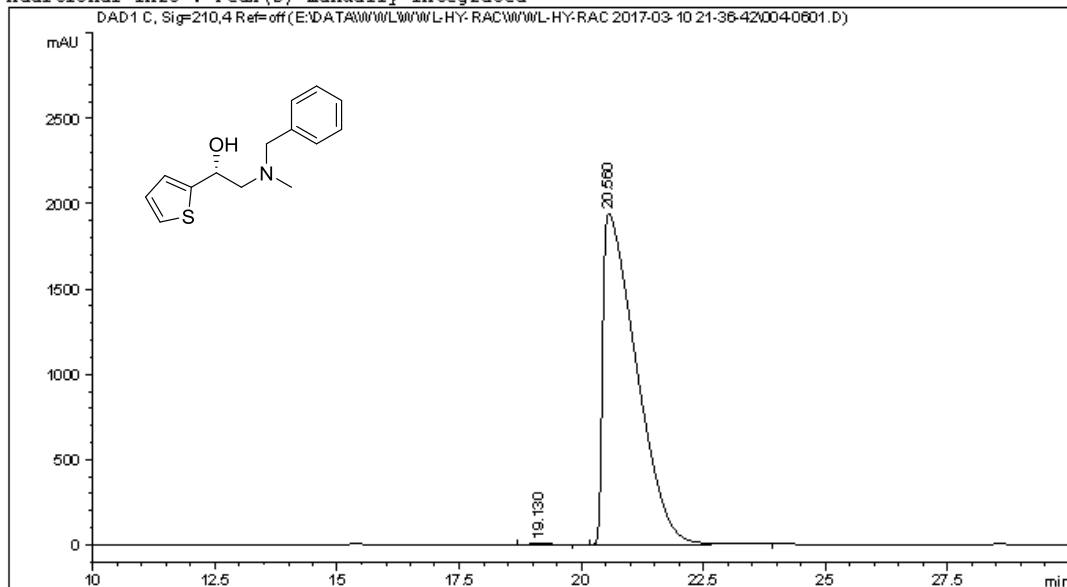

=====  
 Area Percent Report  
 =====

```

Sorted By      :      Signal
Multiplier     :      1.0000
Dilution       :      1.0000
Do not use Multiplier & Dilution Factor with ISTDs
  
```

Signal 1: DAD1 C, Sig=210,4 Ref=off

| Peak # | RetTime [min] | Type | Width [min] | Area [mAU*s] | Height [mAU] | Area %  |
|--------|---------------|------|-------------|--------------|--------------|---------|
| 1      | 19.130        | BB   | 0.3338      | 110.10705    | 4.72548      | 0.1197  |
| 2      | 20.560        | BB   | 0.5945      | 9.18732e4    | 1939.86816   | 99.8803 |

Totals :                                    9.19833e4  1944.59365

=====  
 \*\*\* End of Report \*\*\*

# (R)-2-(benzyl(methyl)amino)-1-(pyridin-2-yl)ethanol (2n)

Data File E:\DATA\WVL\WVL-HY-RAC\WVL-HY-RAC 2017-03-11 15-01-06\001-0201.D  
Sample Name: WVL-HY-PY-RAC

```
=====
Acq. Operator   : SYSTEM                      Seq. Line :    2
Acq. Instrument : 1260HPLC-VWD                Location  : Vial 1
Injection Date  : 3/11/2017 3:12:39 PM        Inj       :    1
                                           Inj Volume: 1.000 µl
Acq. Method     : E:\DATA\WVL\WVL-HY-RAC\WVL-HY-RAC 2017-03-11 15-01-06\VWD-AS(1-6)-97-3-
                  LML-1UL-210NM-40MIN.M
Last changed    : 3/11/2017 3:01:06 PM by SYSTEM
Analysis Method : E:\DATA\WVL\WVL-HY-RAC\WVL-HY-RAC 2017-03-11 15-01-06\VWD-AS(1-6)-97-3-
                  LML-1UL-210NM-40MIN.M (Sequence Method)
Last changed    : 3/11/2017 6:40:28 PM by SYSTEM
                  (modified after loading)
Additional Info : Peak(s) manually integrated
=====
```

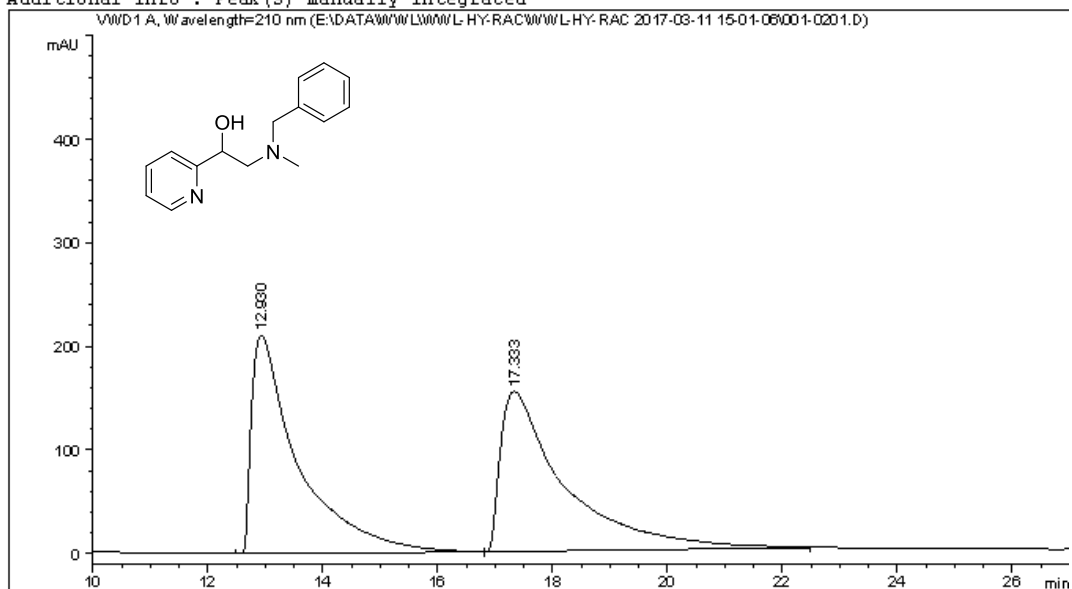

## Area Percent Report

```
Sorted By      : Signal
Multiplier     : 1.0000
Dilution       : 1.0000
Do not use Multiplier & Dilution Factor with ISTDs
```

Signal 1: VWD1 A, Wavelength=210 nm

| Peak # | RetTime [min] | Type | Width [min] | Area [mAU*s] | Height [mAU] | Area %  |
|--------|---------------|------|-------------|--------------|--------------|---------|
| 1      | 12.930        | BB   | 0.7926      | 1.19120e4    | 211.00032    | 49.8365 |
| 2      | 17.333        | BB   | 1.0925      | 1.19901e4    | 154.47755    | 50.1635 |

Totals : 2.39021e4 365.47787

\*\*\* End of Report \*\*\*



**(S)-3-(2-(benzyl(methyl)amino)-1-hydroxyethyl)phenol (2o)**

Data File E:\DATA\WVL\WVL-HY-RAC\WVL-HY-RAC 2017-02-22 08-56-58\042-0401.D  
Sample Name: HY-M-OH-RAC

=====

|                 |                        |            |            |
|-----------------|------------------------|------------|------------|
| Acq. Operator   | : SYSTEM               | Seq. Line  | : 4        |
| Acq. Instrument | : 1260HPLC-DAD         | Location   | : Vial 42  |
| Injection Date  | : 2/22/2017 9:57:24 AM | Inj        | : 1        |
|                 |                        | Inj Volume | : 2.000 µl |

Acq. Method : E:\DATA\WVL\WVL-HY-RAC\WVL-HY-RAC 2017-02-22 08-56-58\DAD-0J(1-6)-80-20-1ML-2UL-ALL-30MIN.M  
Last changed : 2/22/2017 10:24:57 AM by SYSTEM  
(modified after loading)  
Analysis Method : E:\DATA\WVL\WVL-HY-RAC\WVL-HY-RAC 2017-02-22 08-56-58\DAD-0J(1-6)-80-20-1ML-2UL-ALL-30MIN.M (Sequence Method)  
Last changed : 2/24/2017 10:00:38 AM by SYSTEM  
(modified after loading)

Additional Info : Peak(s) manually integrated

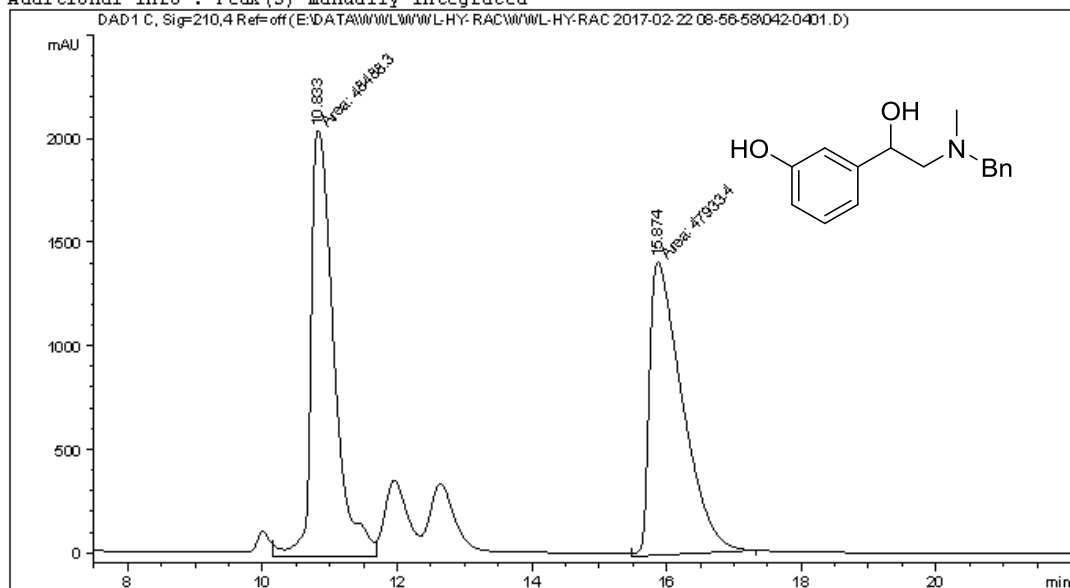

=====  
Area Percent Report  
=====

Sorted By : Signal  
Multiplier : 1.0000  
Dilution : 1.0000  
Do not use Multiplier & Dilution Factor with ISTDs

Signal 1: DAD1 C, Sig=210,4 Ref=off

| Peak # | RetTime [min] | Type | Width [min] | Area [mAU*s] | Height [mAU] | Area %  |
|--------|---------------|------|-------------|--------------|--------------|---------|
| 1      | 10.833        | MM   | 0.3931      | 4.84883e4    | 2055.69678   | 50.2878 |
| 2      | 15.874        | MM   | 0.5646      | 4.79334e4    | 1415.00256   | 49.7122 |

Totals : 9.64216e4 3470.69934



## 7. Reference

1. C. Joyanta, P. Susmita, R. Sujit, *J. Am. Chem. Soc.*, 2005, **127**, 6162.
2. D. Yang, Y. Long, H. Wang, Z. Zhang, *Org. Lett.*, 2008, **10**, 4723.
3. W. Wu, Y. Xie, P. Li, X. Li, Y. Liu, X.-Q. Dong and X. Zhang, *Org. Chem. Front.*, 2017, **4**, 555.
4. H.-S. Chong, X. Ma, H. Lee, P. Bui, H. A. Song and N. Birch, *J. Med. Chem.*, 2008, **51**, 2208.
5. K. V. Rao, M. R. Prasad, A. R. Rao, *J. Heterocyclic Chem.*, 2014, **51**, 380.
6. M. L. Yuan, J. H. Xie, X. H. Yang and Q. L. Zhou, *Synthesis*, 2014, **46**, 2910.
7. A. D. Pechulis, J. P. Beck, M. A. Curry, M. A. Wolf, A. E. Harms, N. Xi, C. Opalka, M. P. Sweet, Z. Yang, A. S. Vellekoop, A. M. Klos, P. J. Crocker, C. Hassler, M. Laws, D. B. Kitchen, M. A. Smith, R. E. Olson, S. Liu and B. F. Molino, *Bioorg. Med. Chem. Lett.*, 2012, **22**, 7219.
8. W. Wu, S. Liu, M. Duan, X. Tan, C. Chen, Y. Xie, Y. Lan, X. Q. Dong and X. Zhang, *Org. Lett.*, 2016, **18**, 2938.
9. S. Miyano, L. D. L. Lu, S. M. Viti, K. B. Sharpless, *J. Org. Chem.*, 1983, **48**, 3608.
10. J. R. Corrigan, M.-J. Sullivan, H. W. Bishop, A. W. Ruddy, *J. Am. Chem. Soc.*, 1953, **75**, 6258.
11. R. E. Lutz, R. K. Allison, G. Ashburn, P. S. Bailey, M. T. Clark, J. F. Codington, A. J. Deinet, J. A. Freek, R. H. Jordan, N. H. Leake, T. A. Martin, K. C. Nicodemus, R. J. Rowlett, N. H. Shearer, J. D. Smith, J. W. Wilson, *J. Org. Chem.*, 1947, **12**, 617.
12. A. Tafelska-Kaczmarek, A. Prewysz-Kwinto, K. Skowerski, K. Pietrasiak, A. Kozakiewicz, M. Zaidlewicz, *Tetrahedron: Asymmetry* 2010, **21**, 2244.
13. J. F. McGarrity, A. Zanotti-Gerosa, *Tetrahedron: Asymmetry* 2010, **21**, 2479.
